# Supplementary material for: Microwave assisted synthesis of β-keto thioethers and furan derivatives by thiol directed multicomponent reactions
Source: Royal Society of Chemistry journal article supplement (doi:10.1039/d0nj00587h), 2020-01-01
Supplement: d0nj00587h1.pdf [file d0nj00587h1.pdf]

## Supporting Information

### Microwave assisted synthesis of $\beta$ -keto thioethers and furan derivatives by thiol directed multicomponent reactions

Asim Jana,<sup>a</sup> Prabhas Bhaumick<sup>a</sup> and Lokman H. Choudhury<sup>a\*</sup>

*Department of Chemistry, Indian Institute of Technology Patna, Bihta, Patna-801106, India*

---

#### Table of contents:

1. Copies of <sup>1</sup>H and <sup>13</sup>C NMR spectra of all products.....S2-S32
2. Crystal structure description of **4c** and **5**.....S33-S36

# $^1\text{H}$ & $^{13}\text{C}$ Spectra of 4a

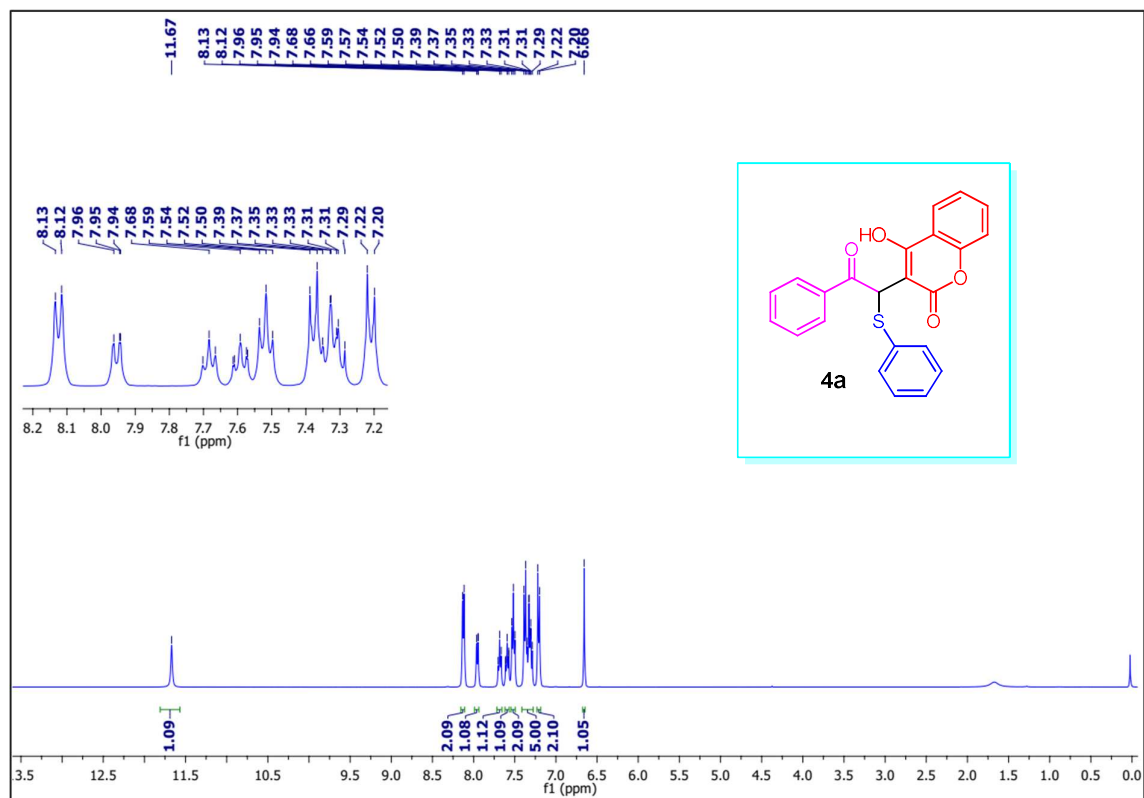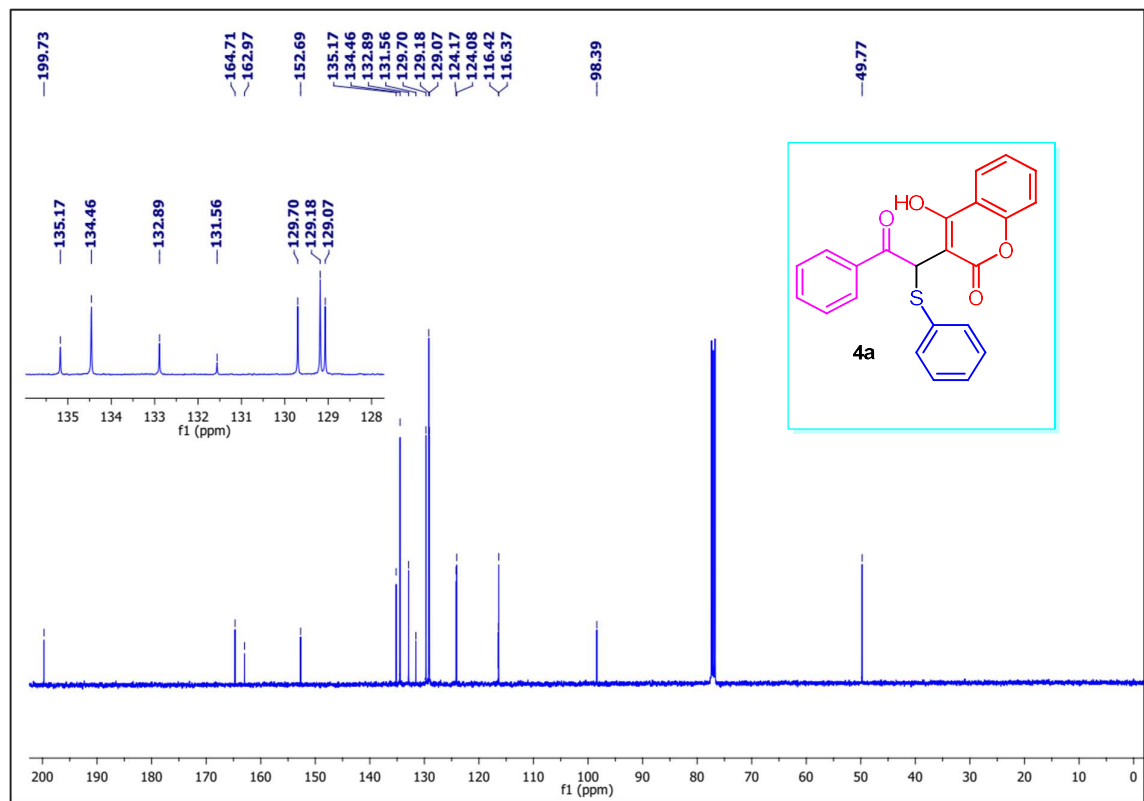

# $^1\text{H}$ & $^{13}\text{C}$ Spectra of 4b

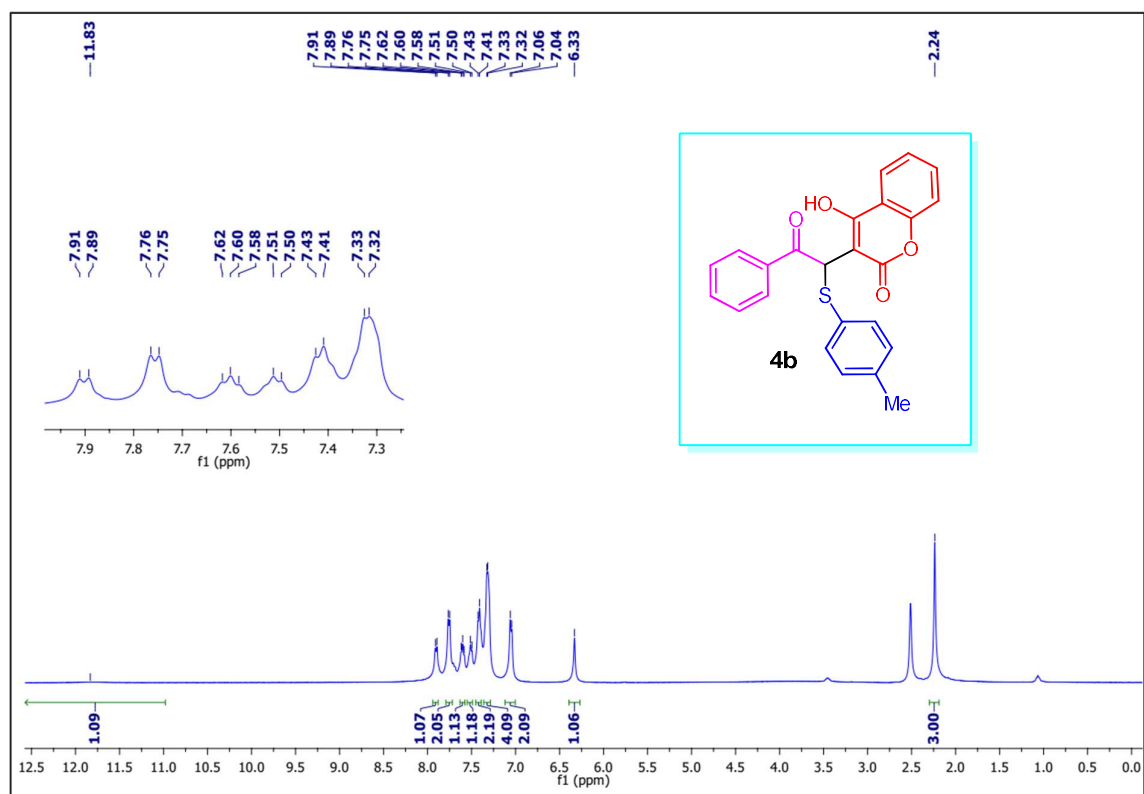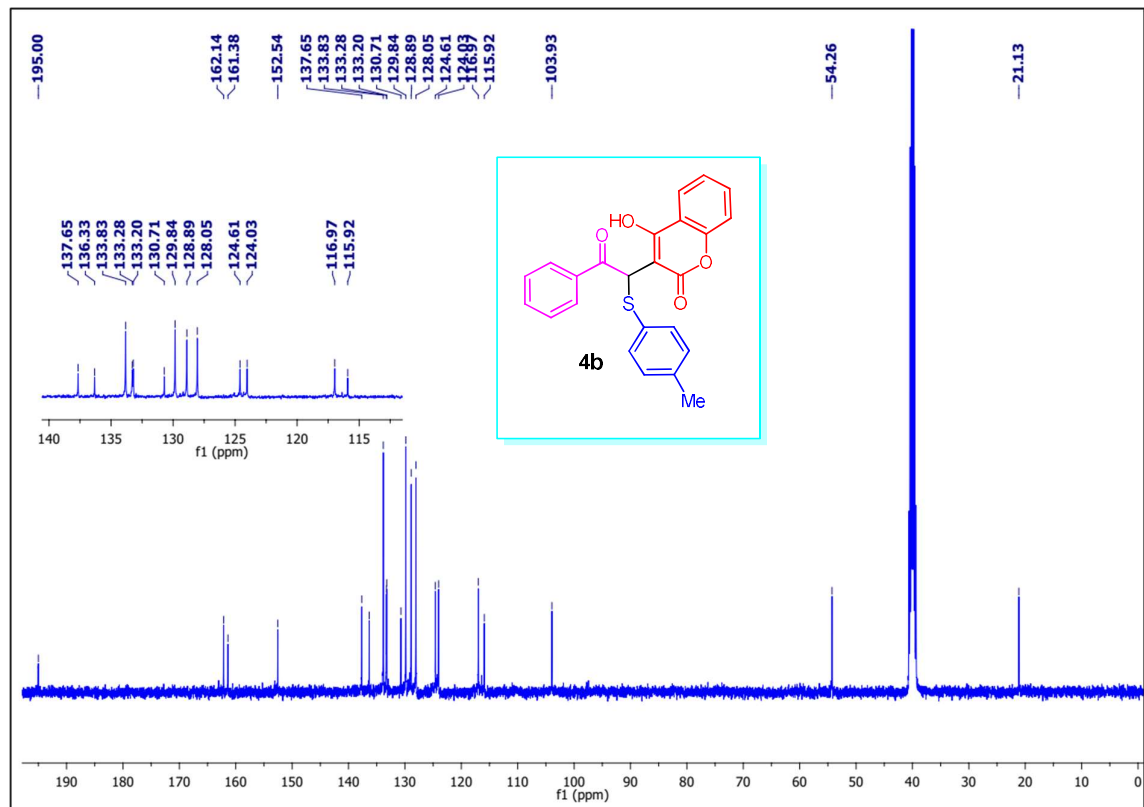

# $^1\text{H}$ & $^{13}\text{C}$ Spectra of 4c

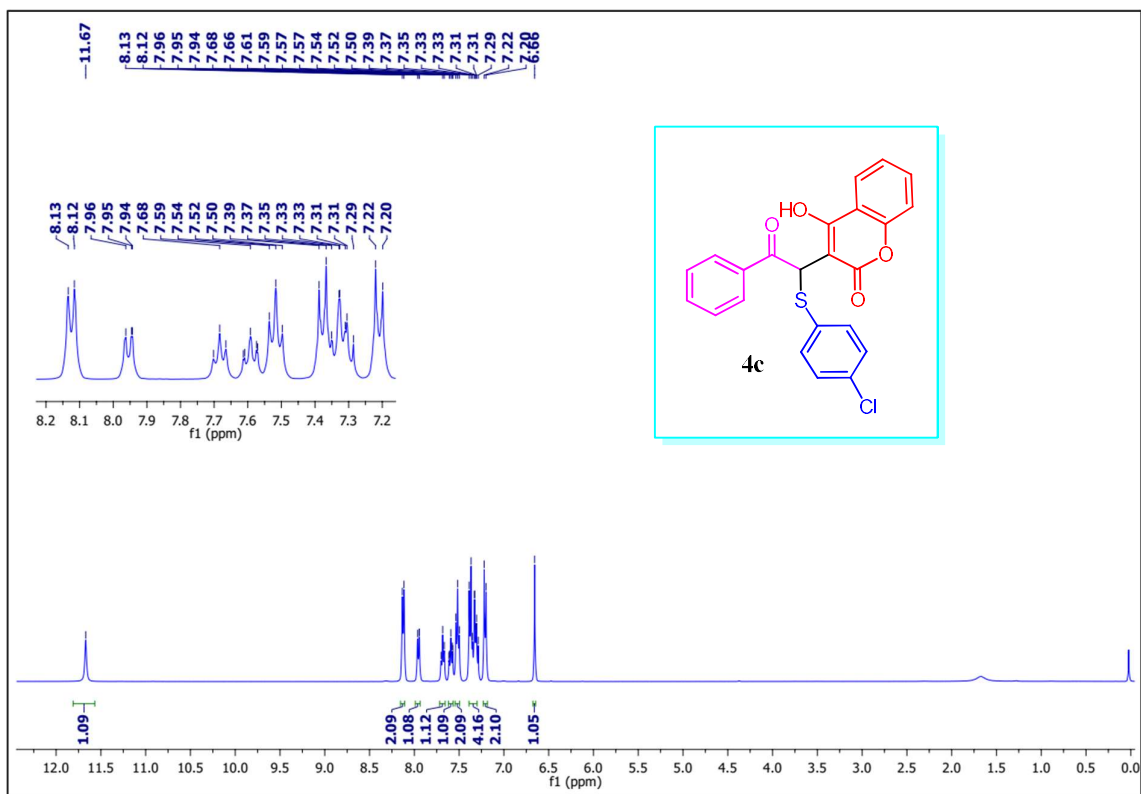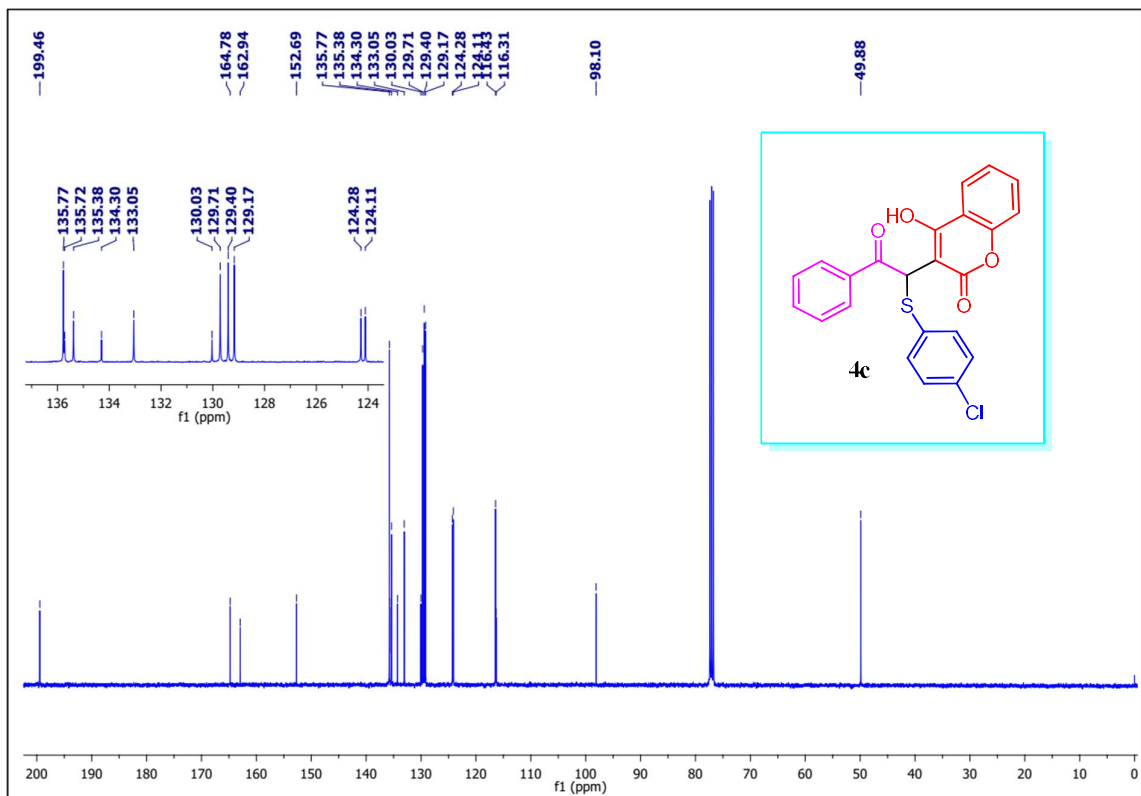

# <sup>1</sup>H & <sup>13</sup>C Spectra of 4d

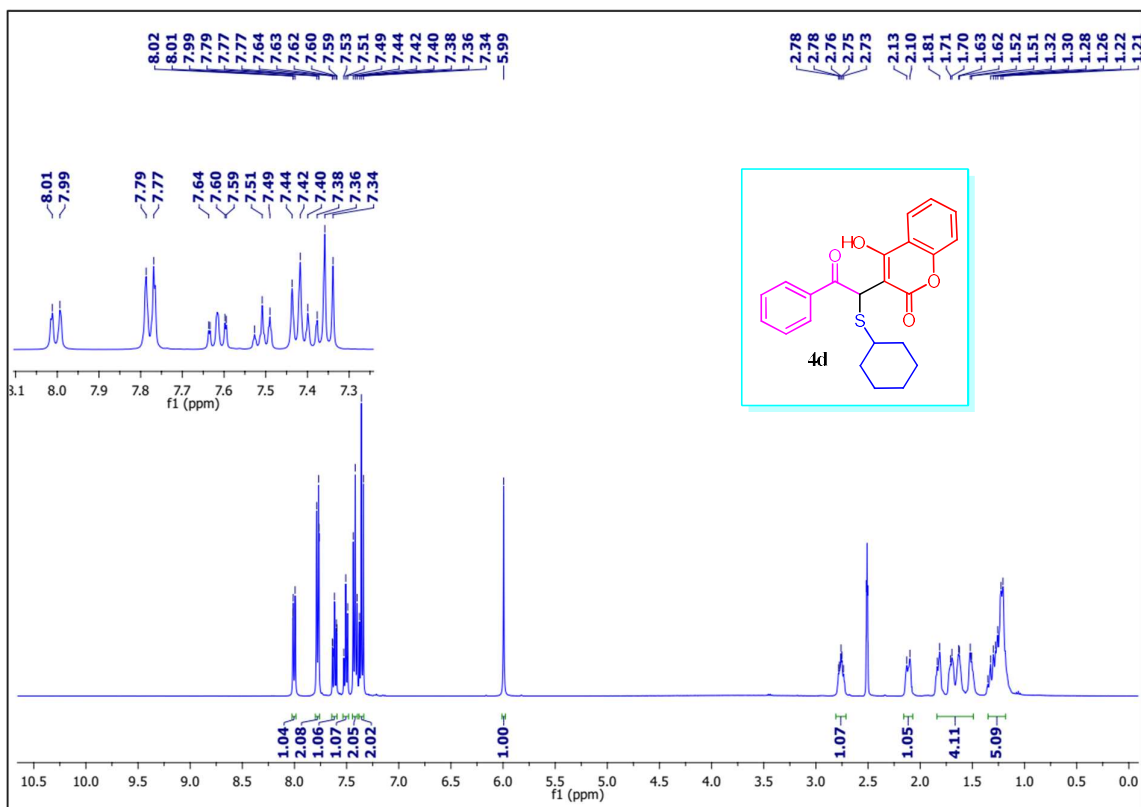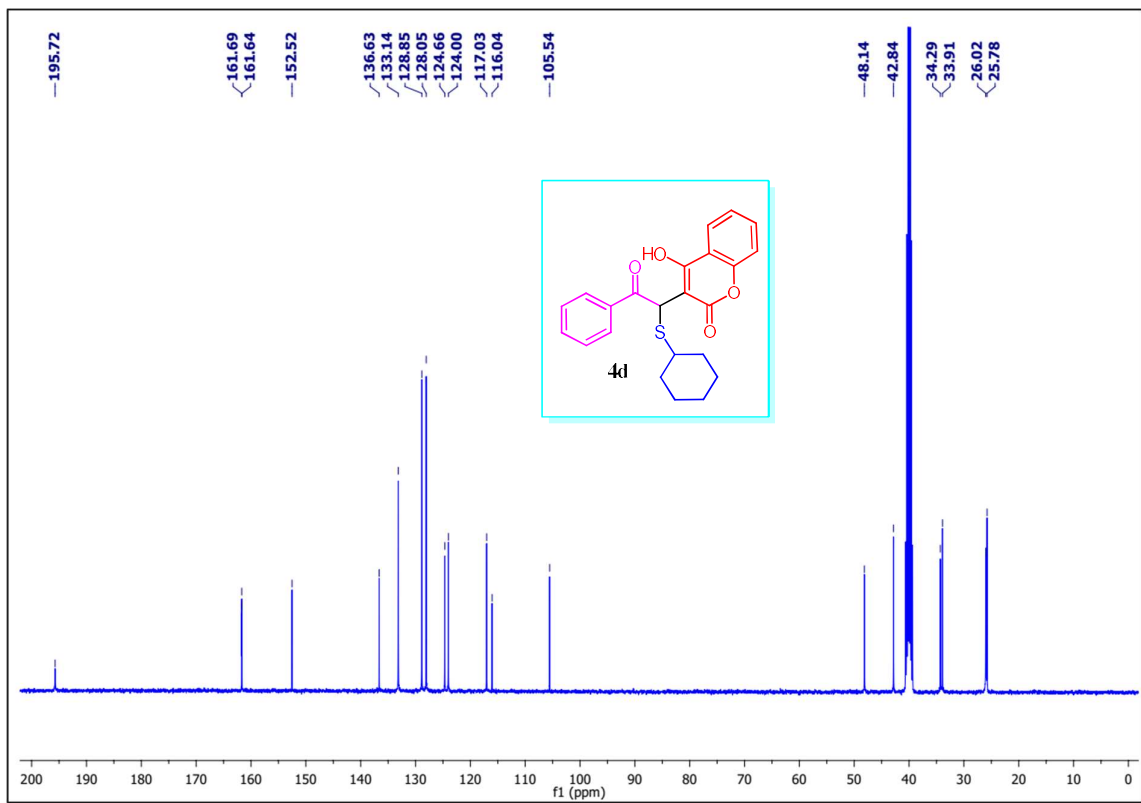

# $^1\text{H}$ & $^{13}\text{C}$ Spectra of 4e

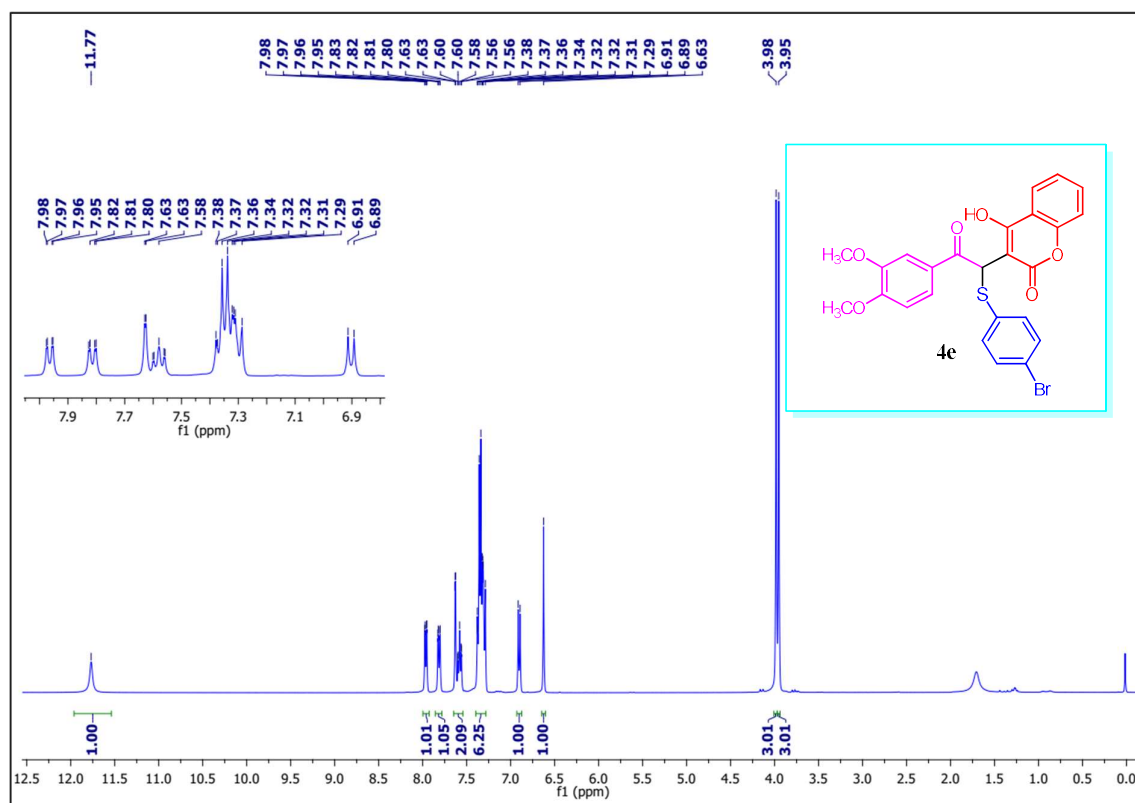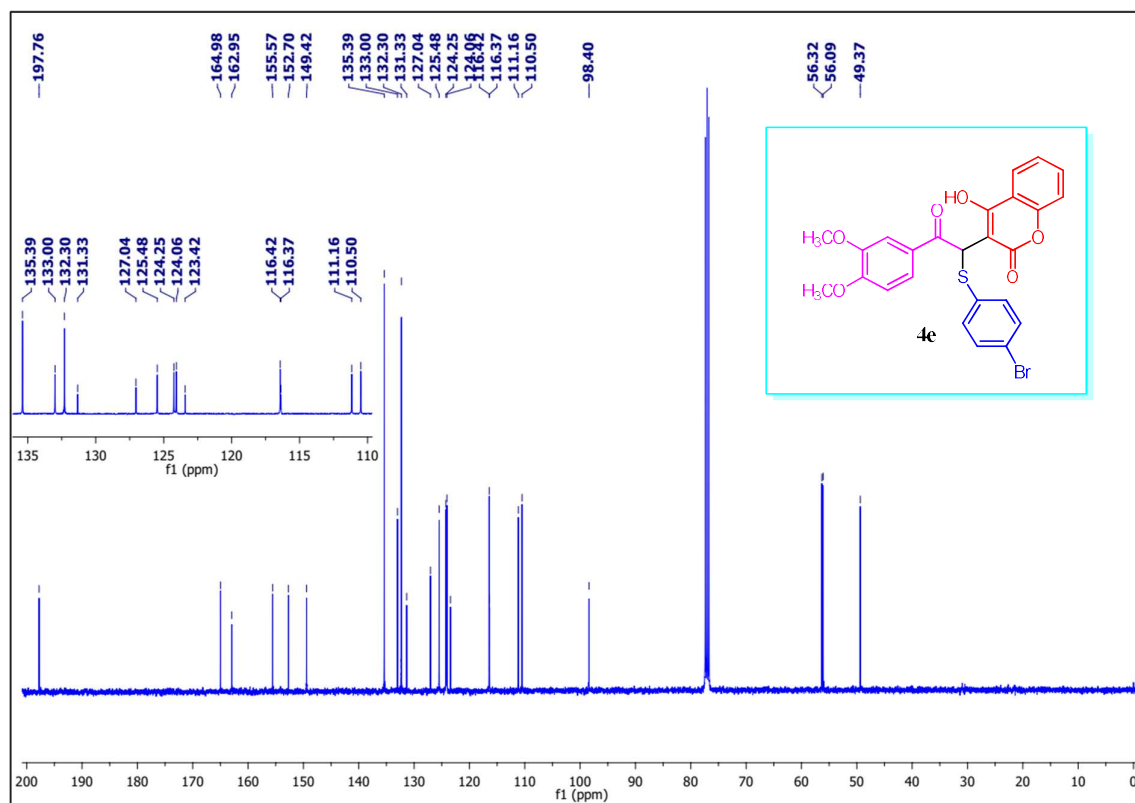

<sup>1</sup>H & <sup>13</sup>C Spectra of 4f

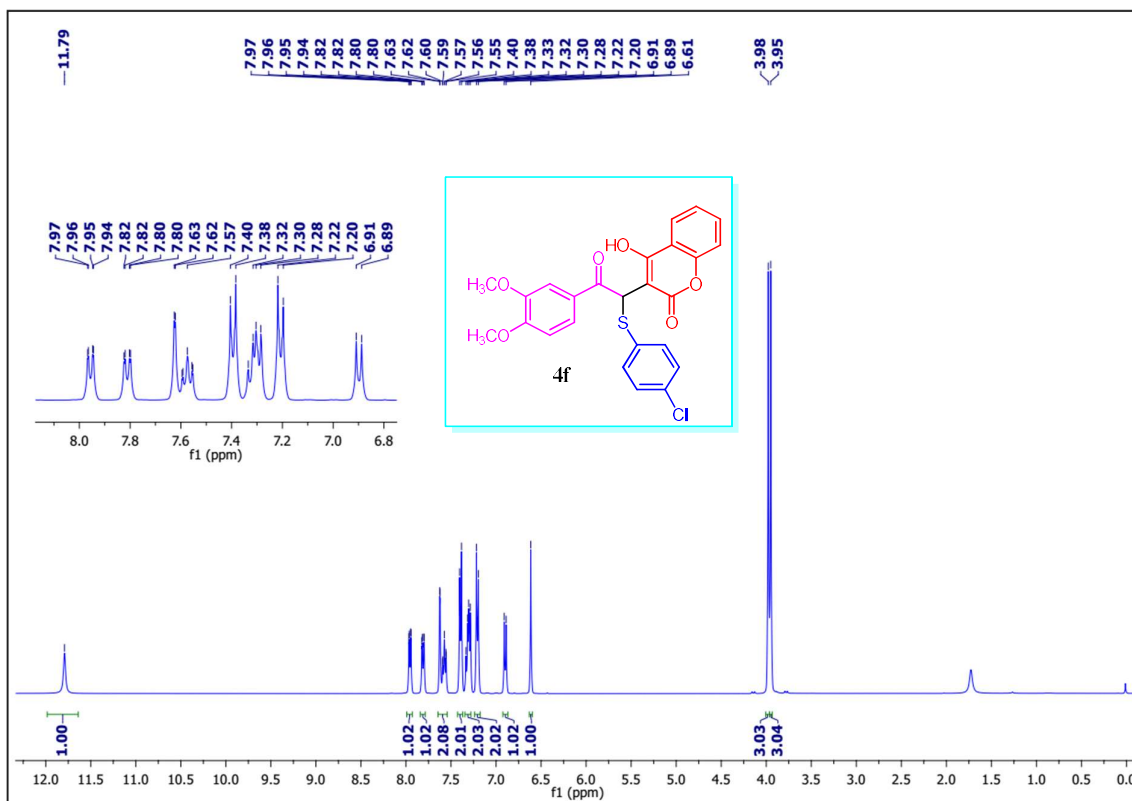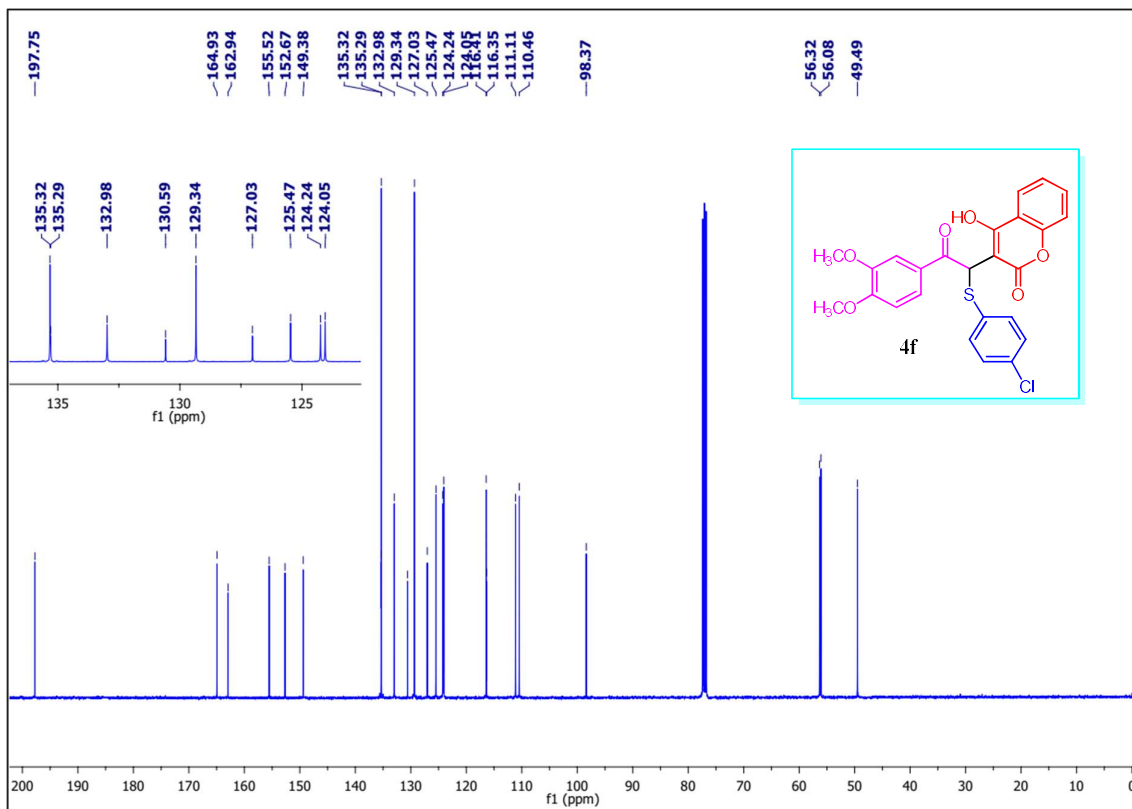

# <sup>1</sup>H & <sup>13</sup>C Spectra of 4g

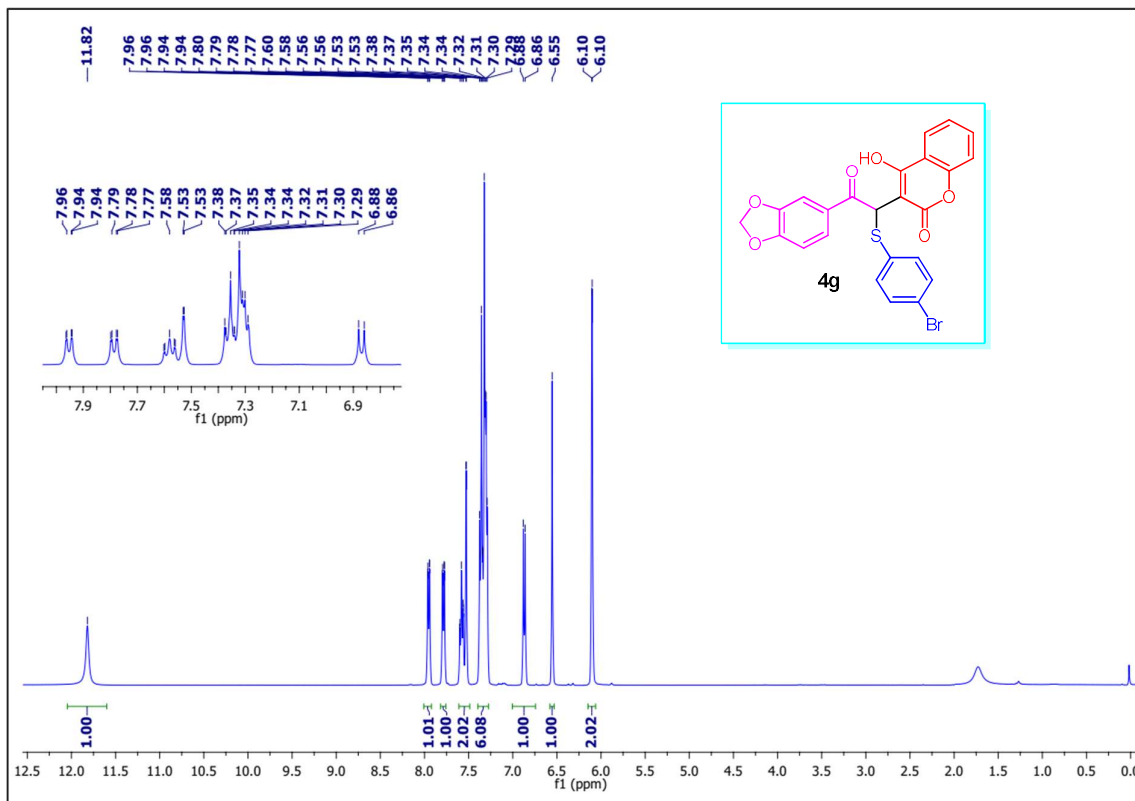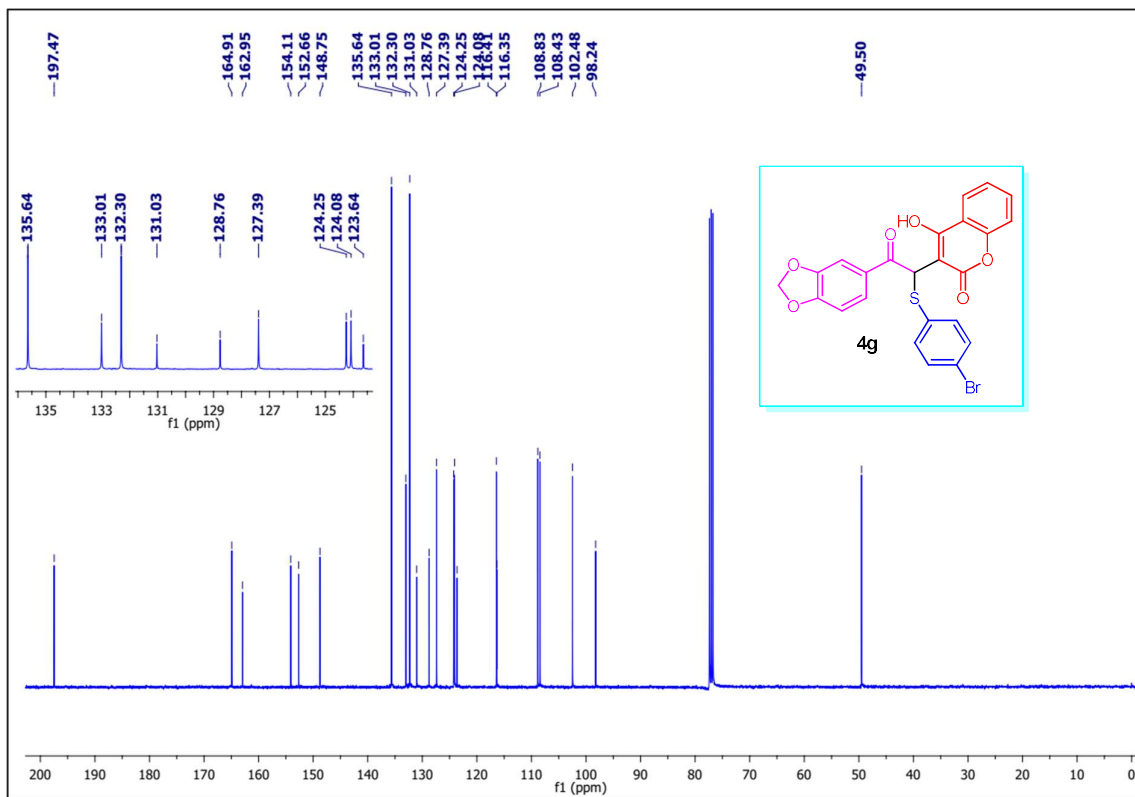



# <sup>1</sup>H & <sup>13</sup>C Spectra of 4h

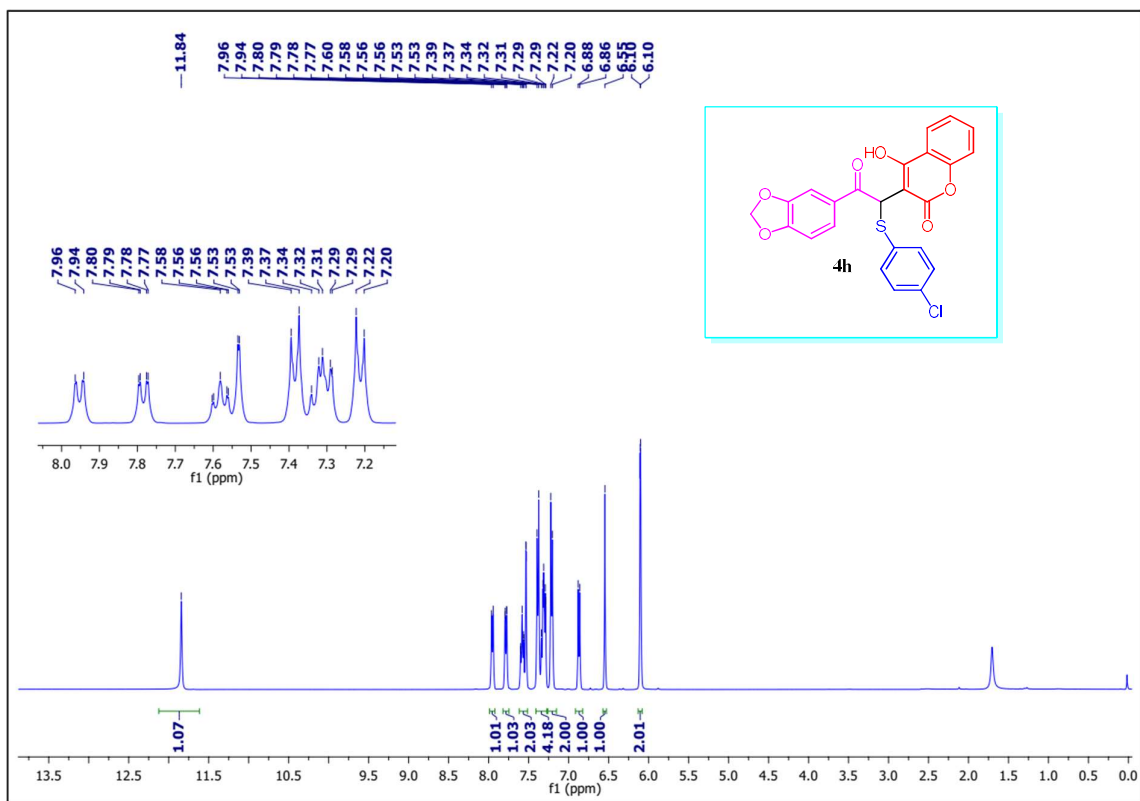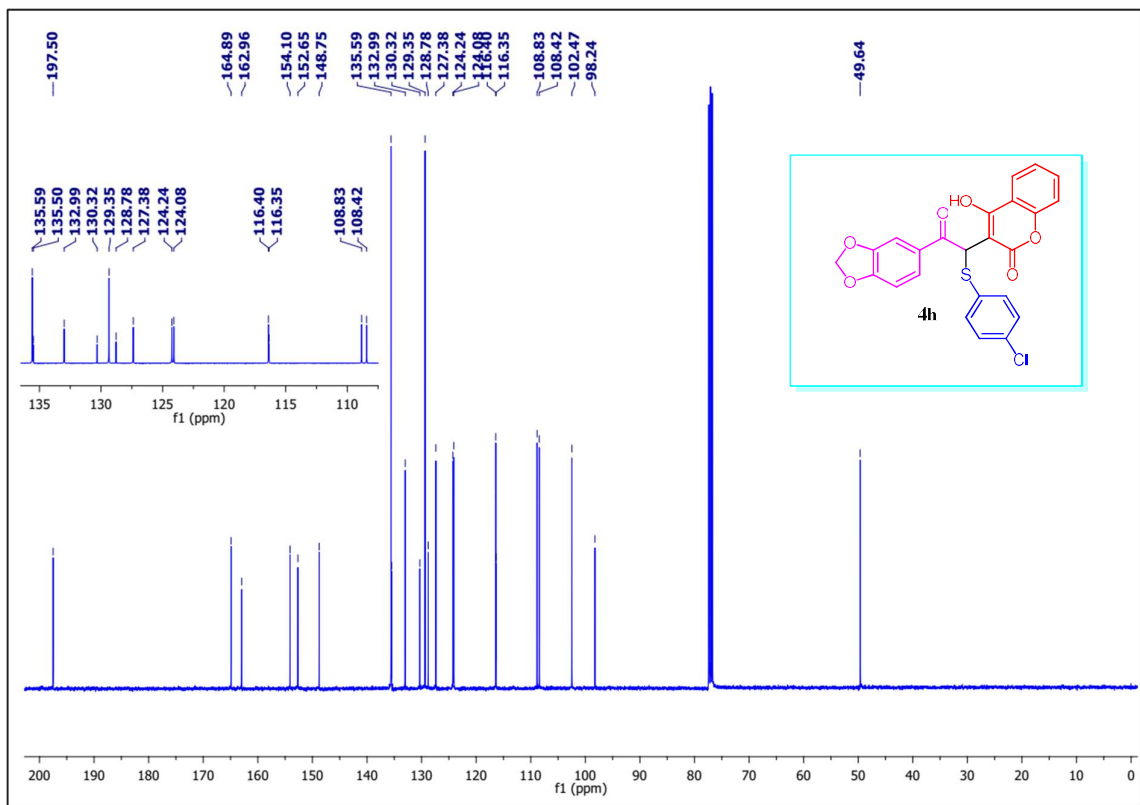

<sup>1</sup>H & <sup>13</sup>C Spectra of 4i

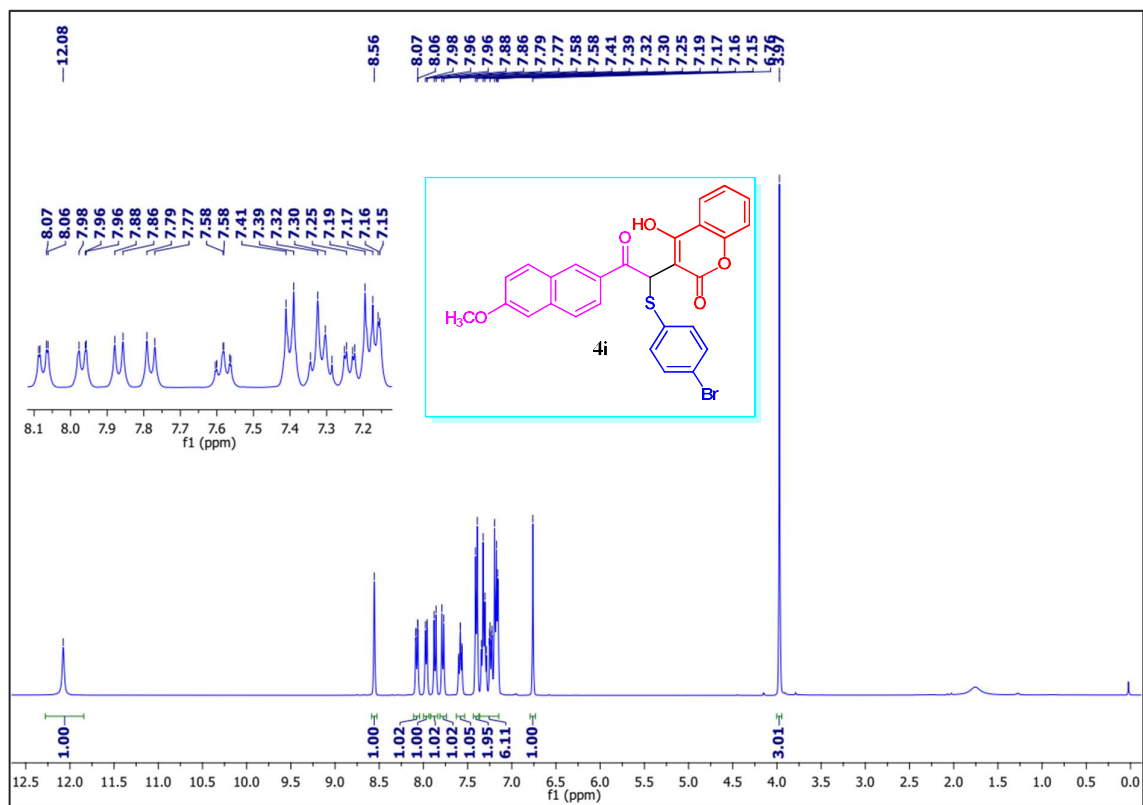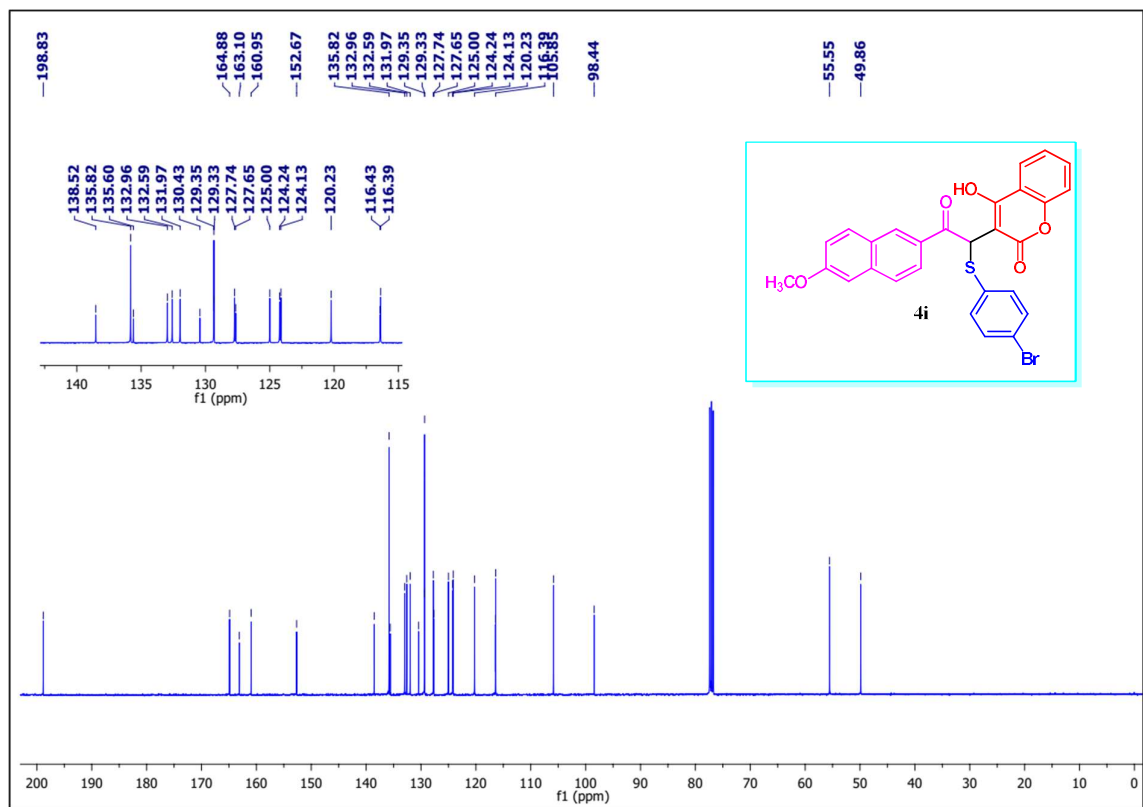

<sup>1</sup>H & <sup>13</sup>C Spectra of 4j

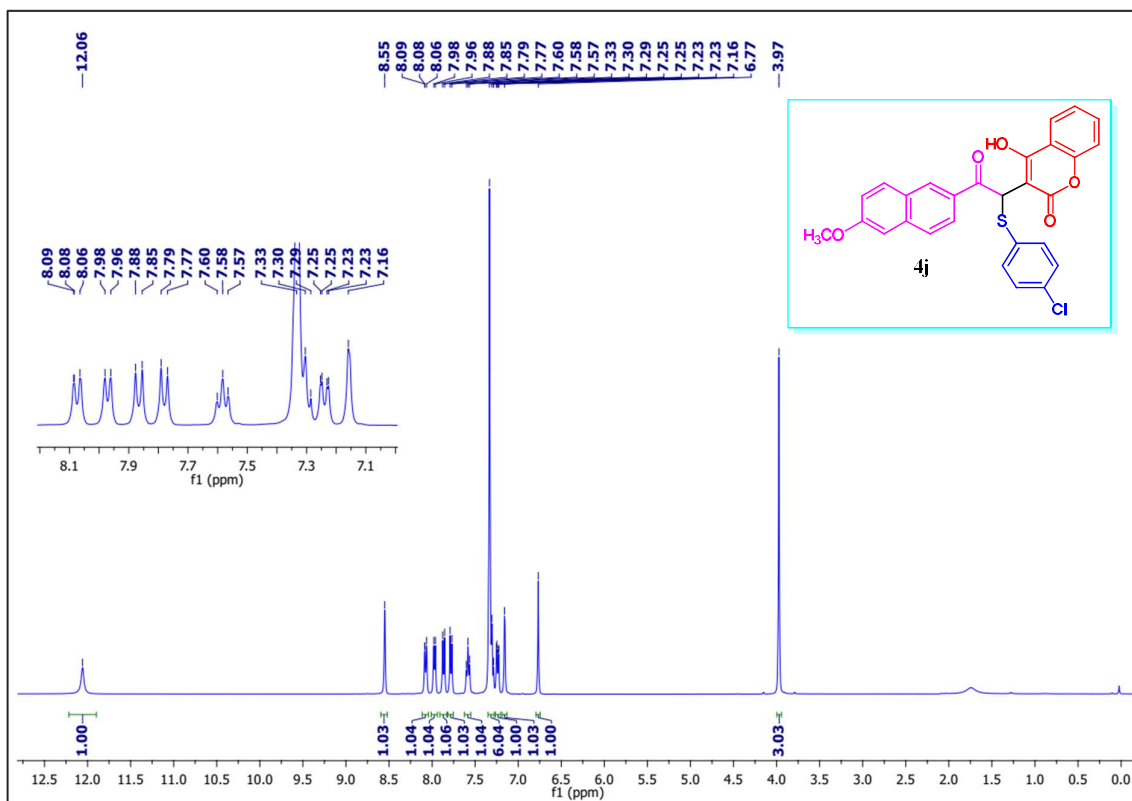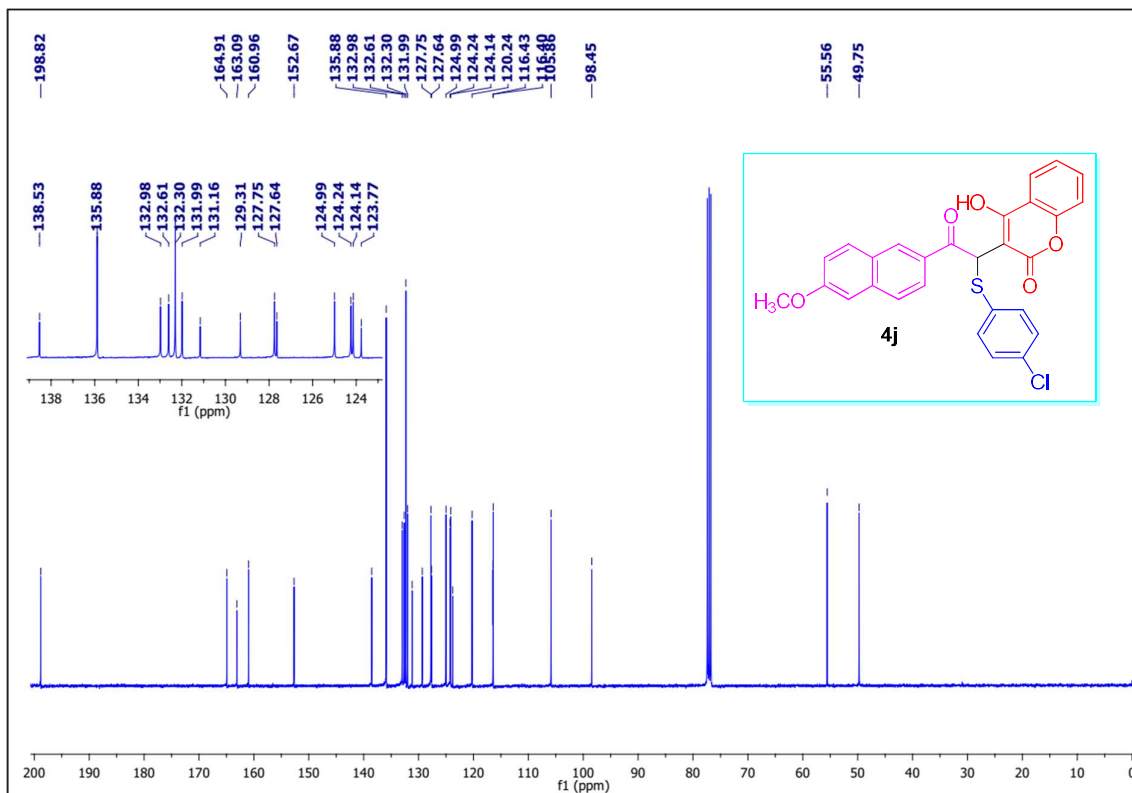

# <sup>1</sup>H & <sup>13</sup>C Spectra of 4k

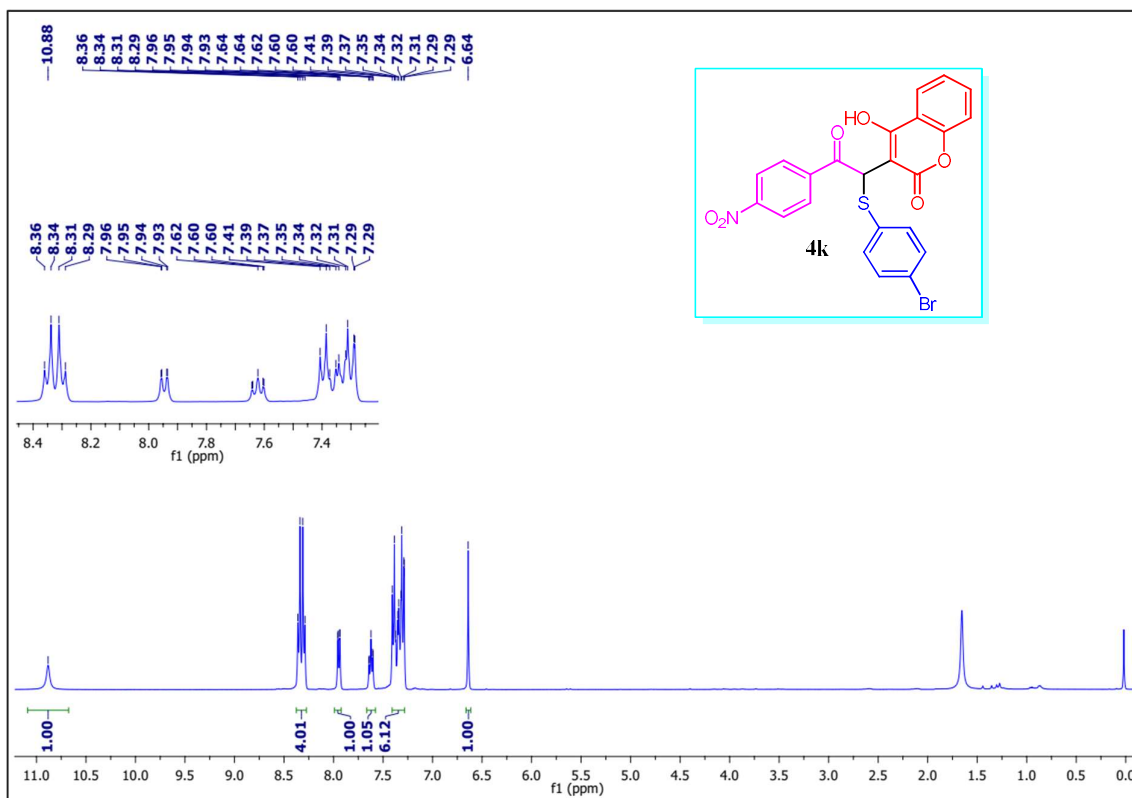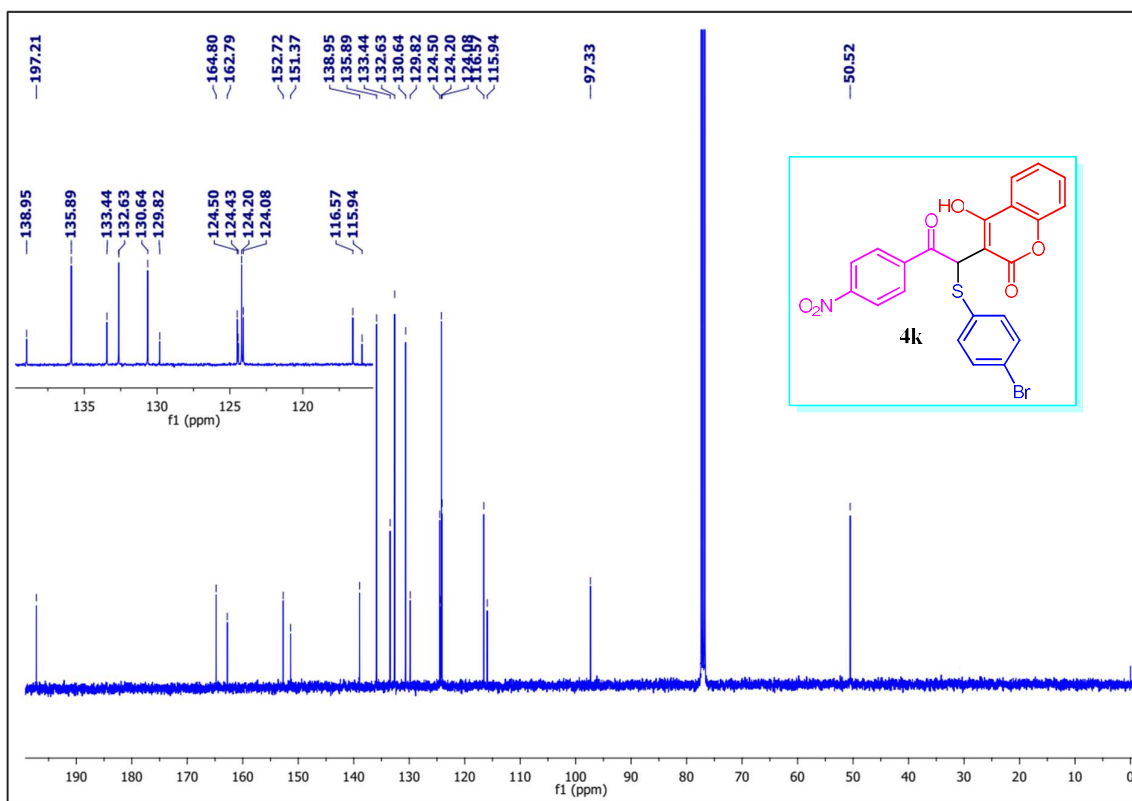

# <sup>1</sup>H & <sup>13</sup>C Spectra of 4l

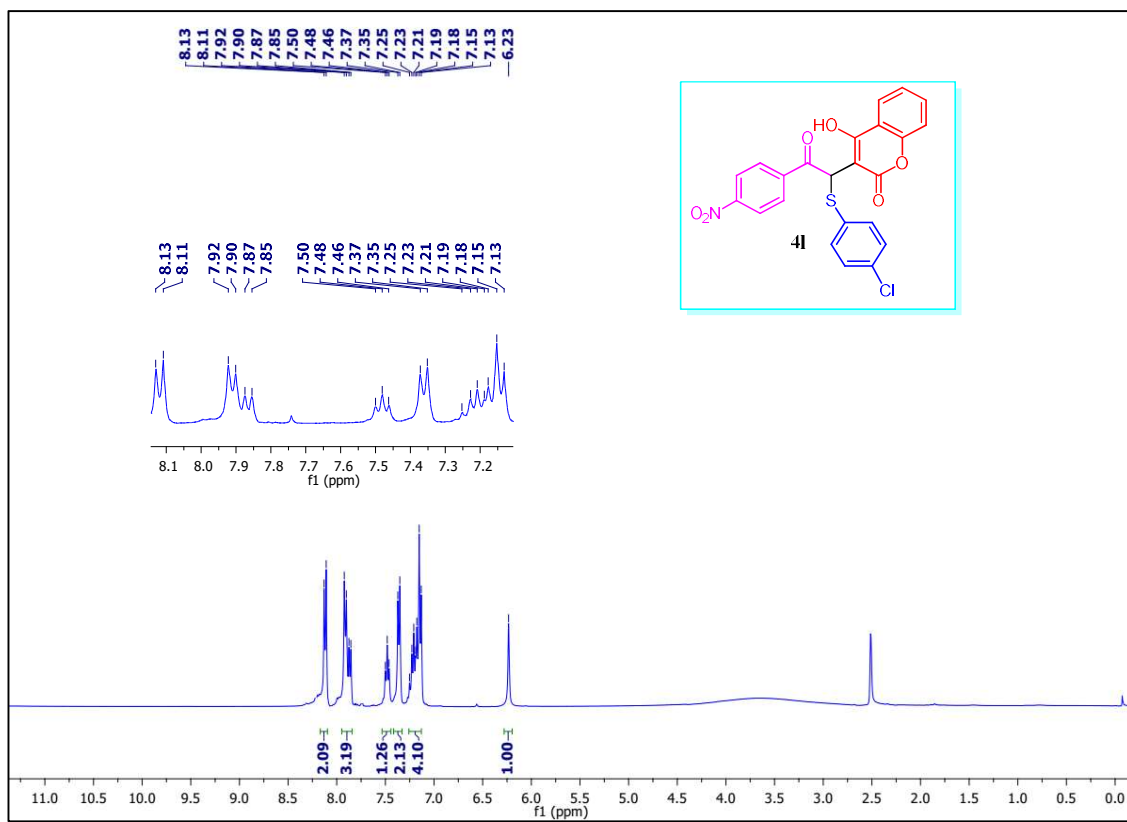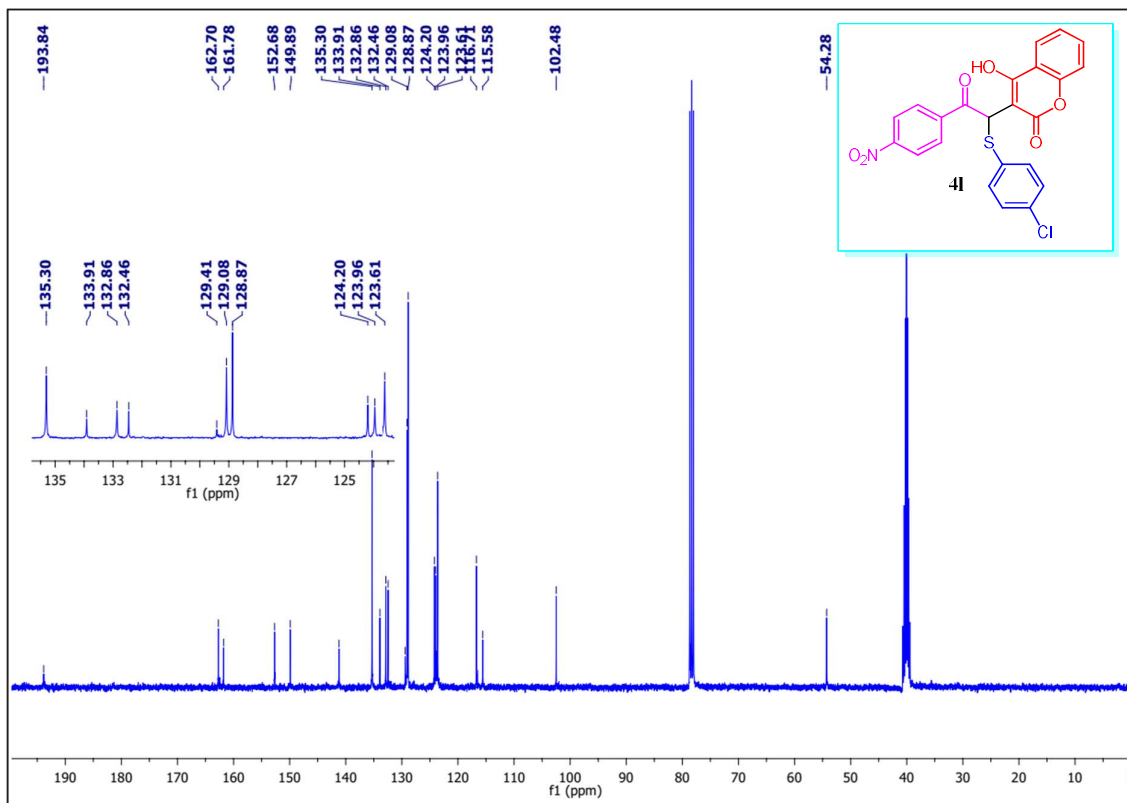

# <sup>1</sup>H & <sup>13</sup>C Spectra of 4m

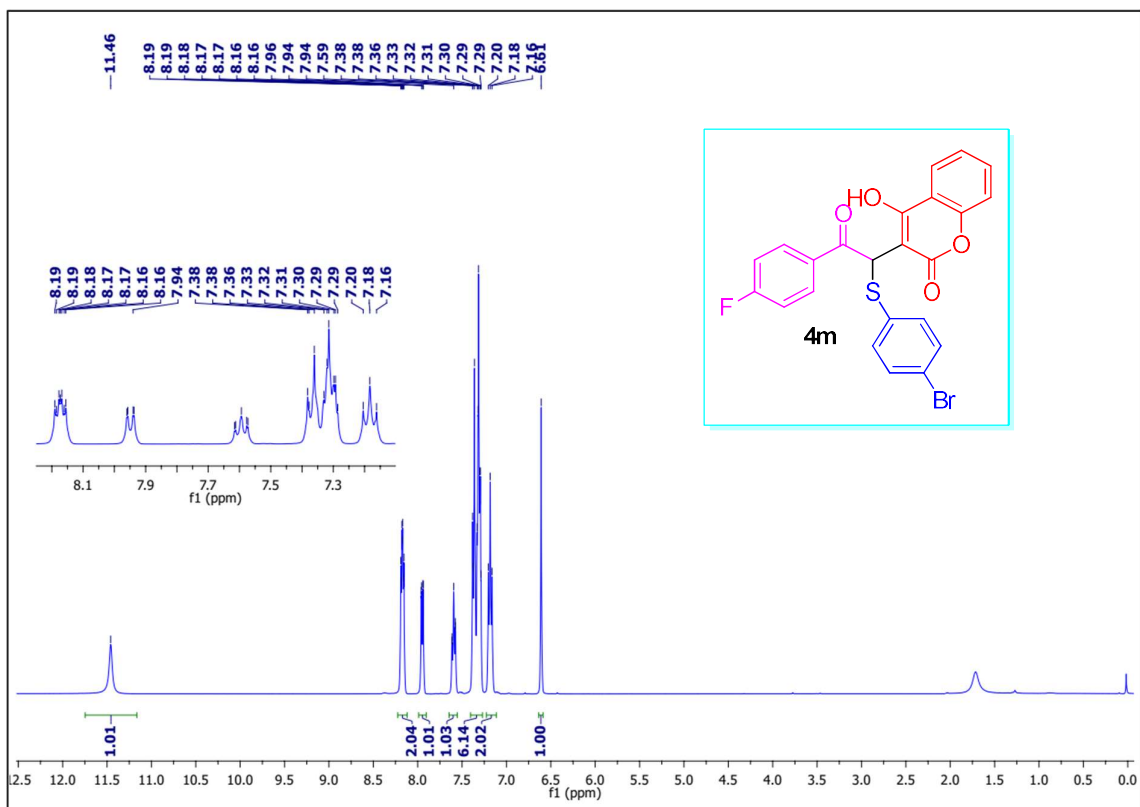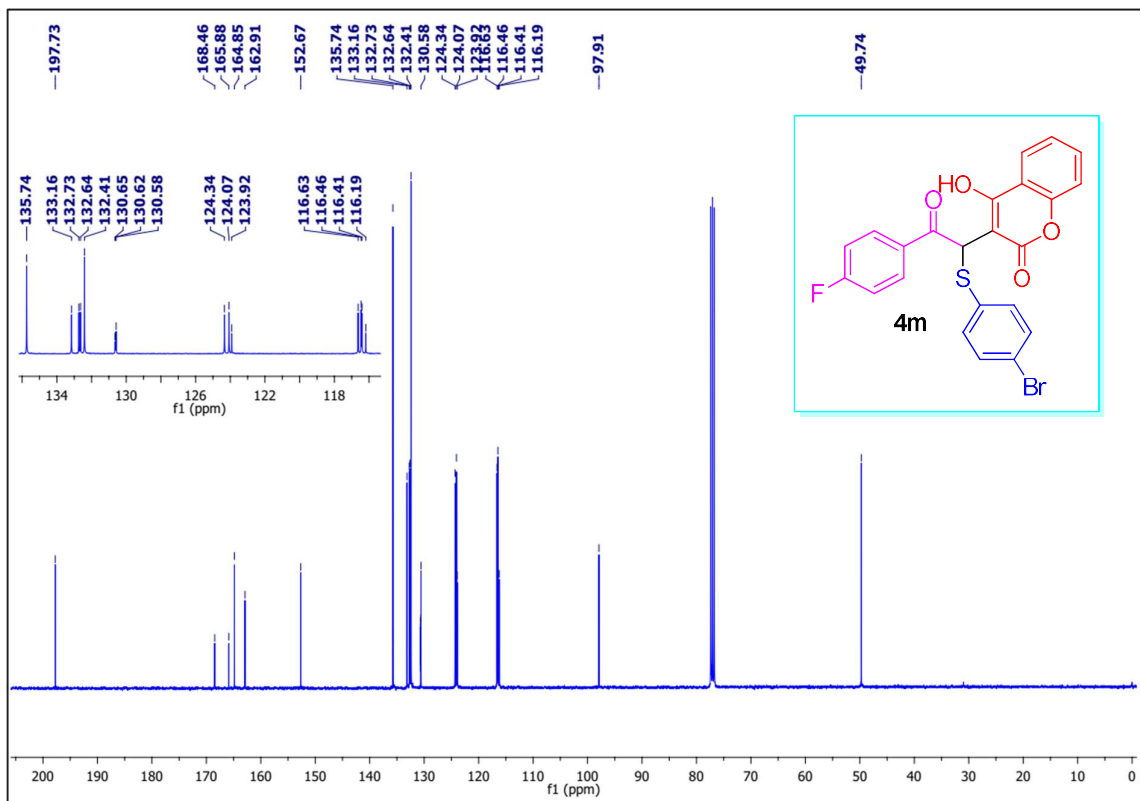

<sup>1</sup>H & <sup>13</sup>C Spectra of 4n

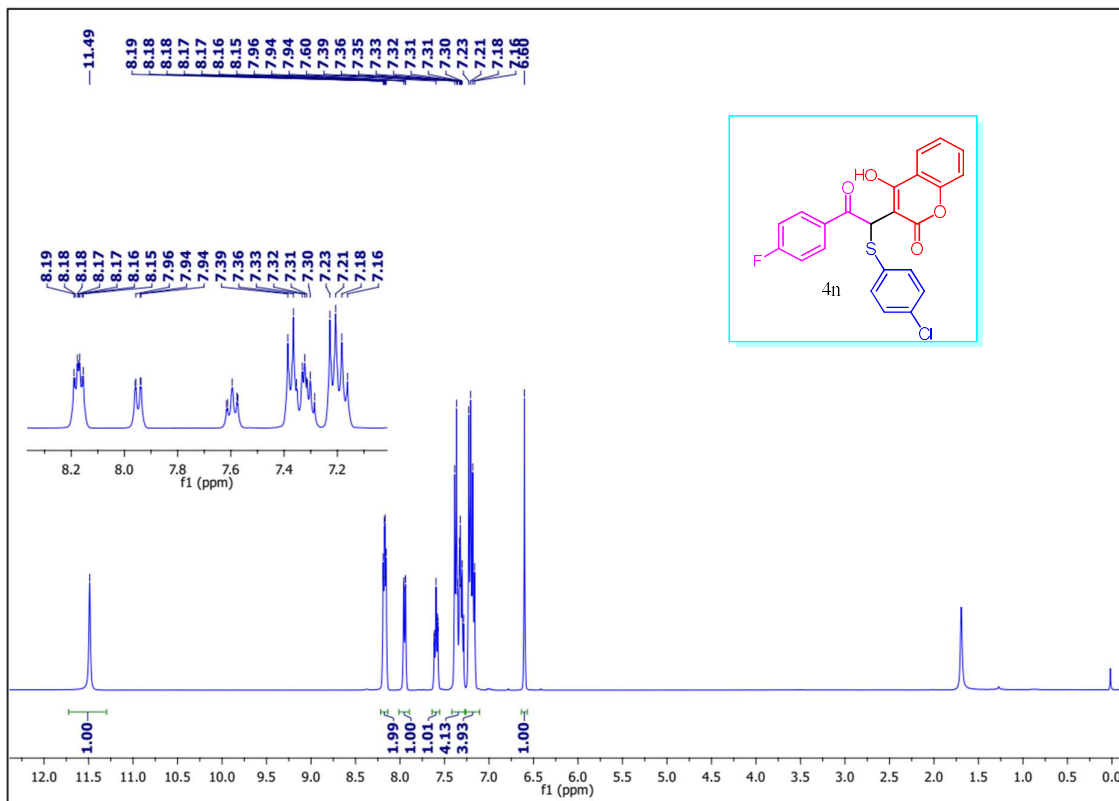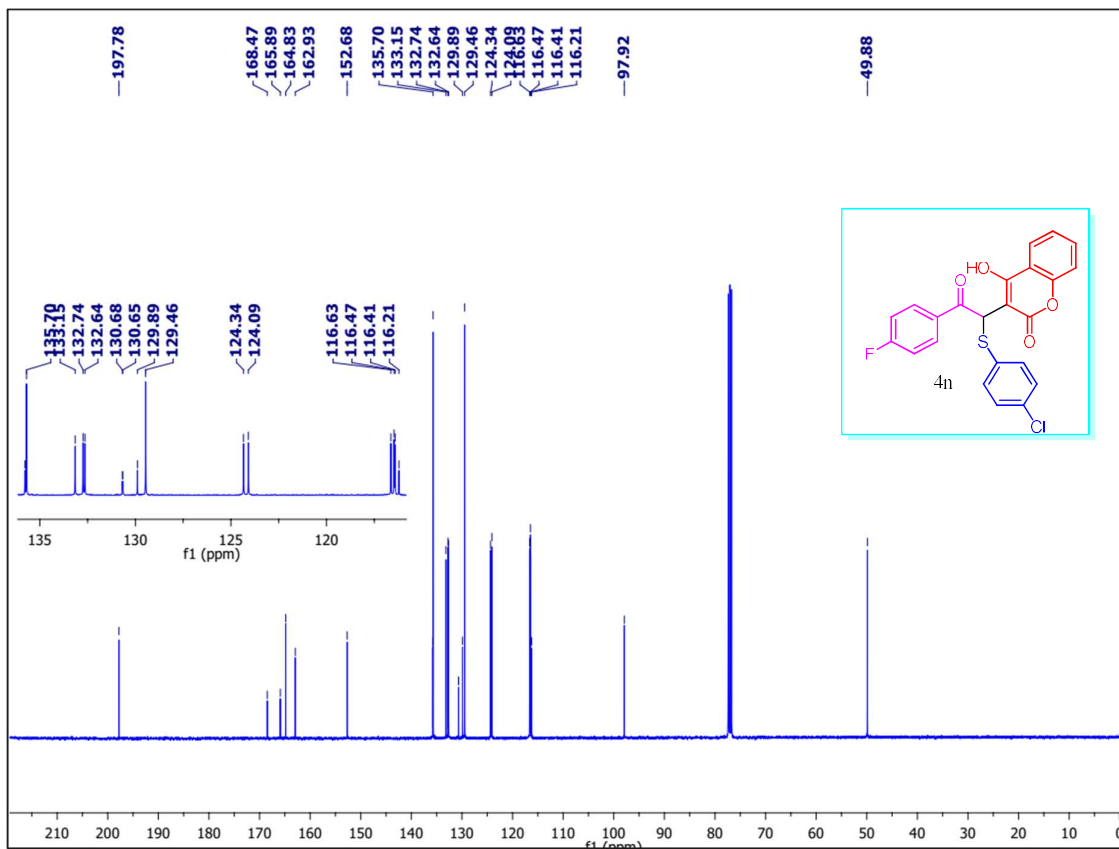

# <sup>1</sup>H & <sup>13</sup>C Spectra of 4o

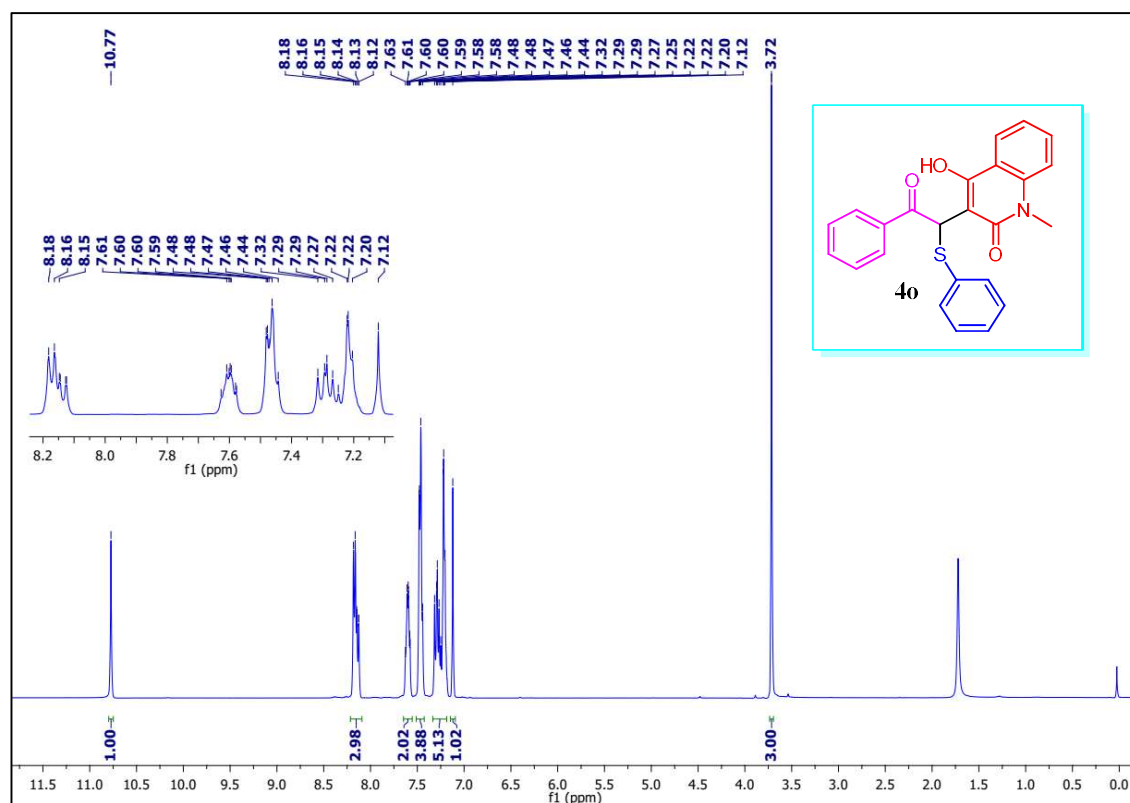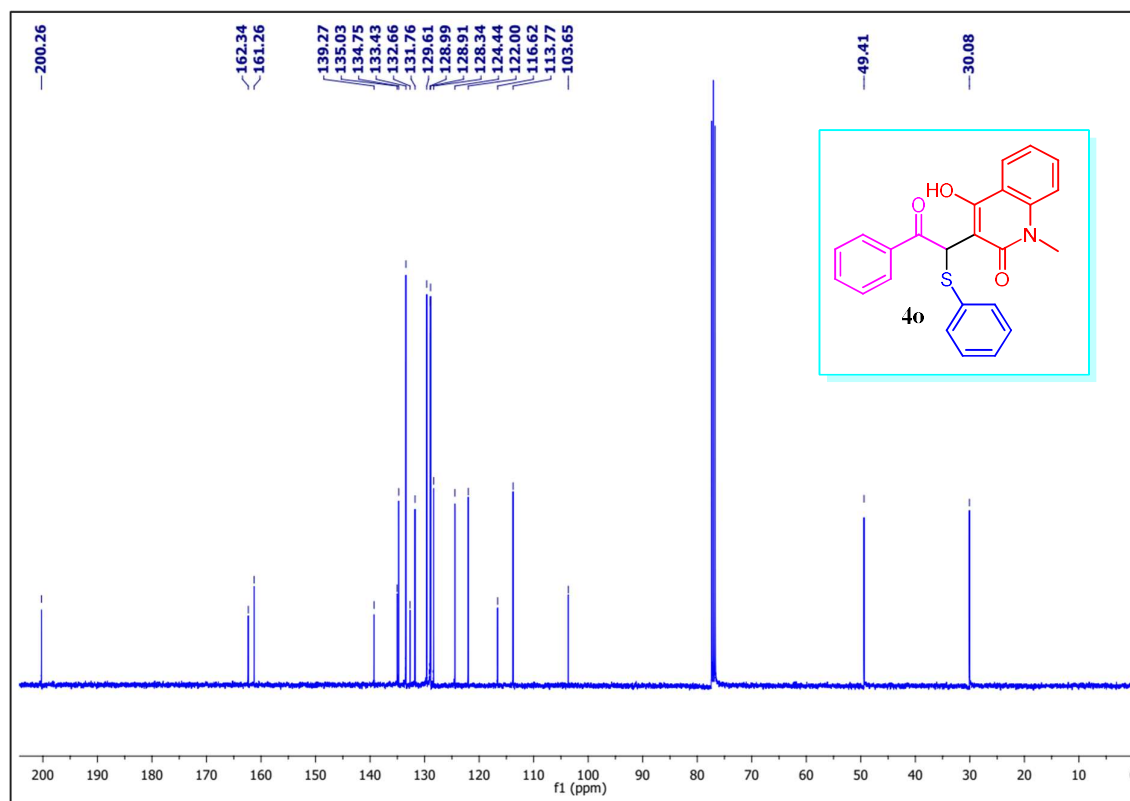



# $^1\text{H}$ & $^{13}\text{C}$ Spectra of 4p

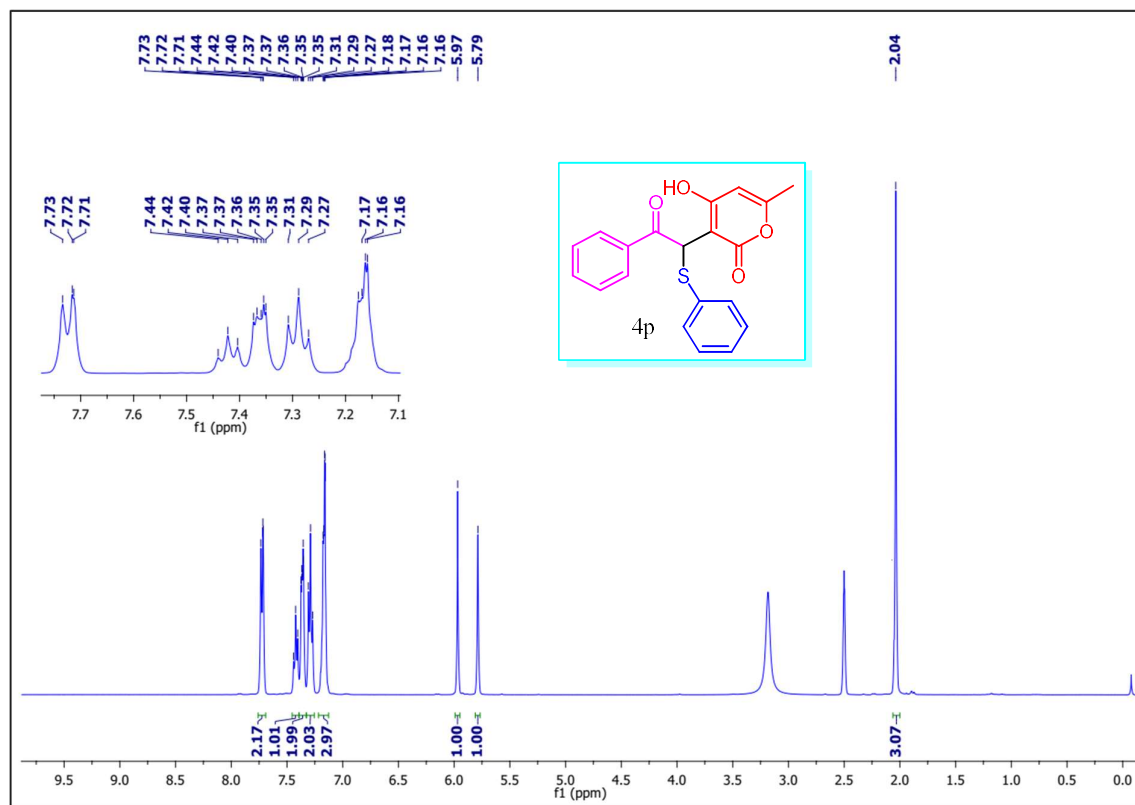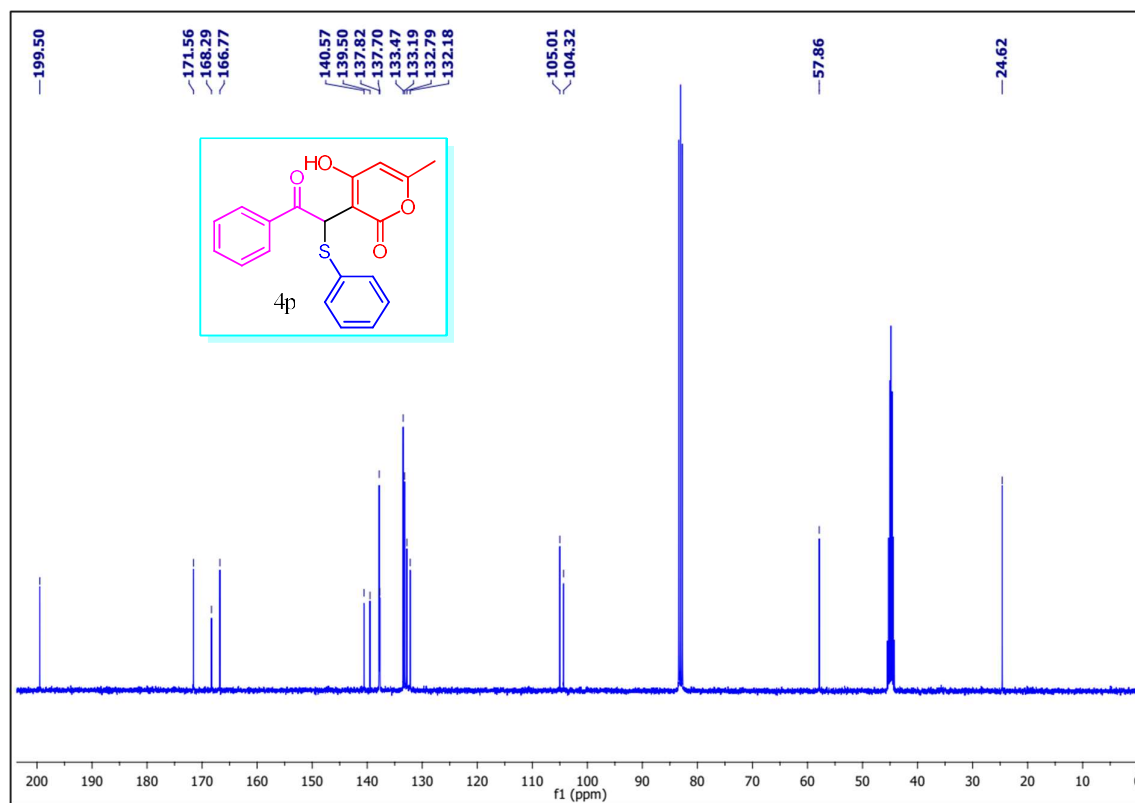

# $^1\text{H}$ & $^{13}\text{C}$ Spectra of 4q

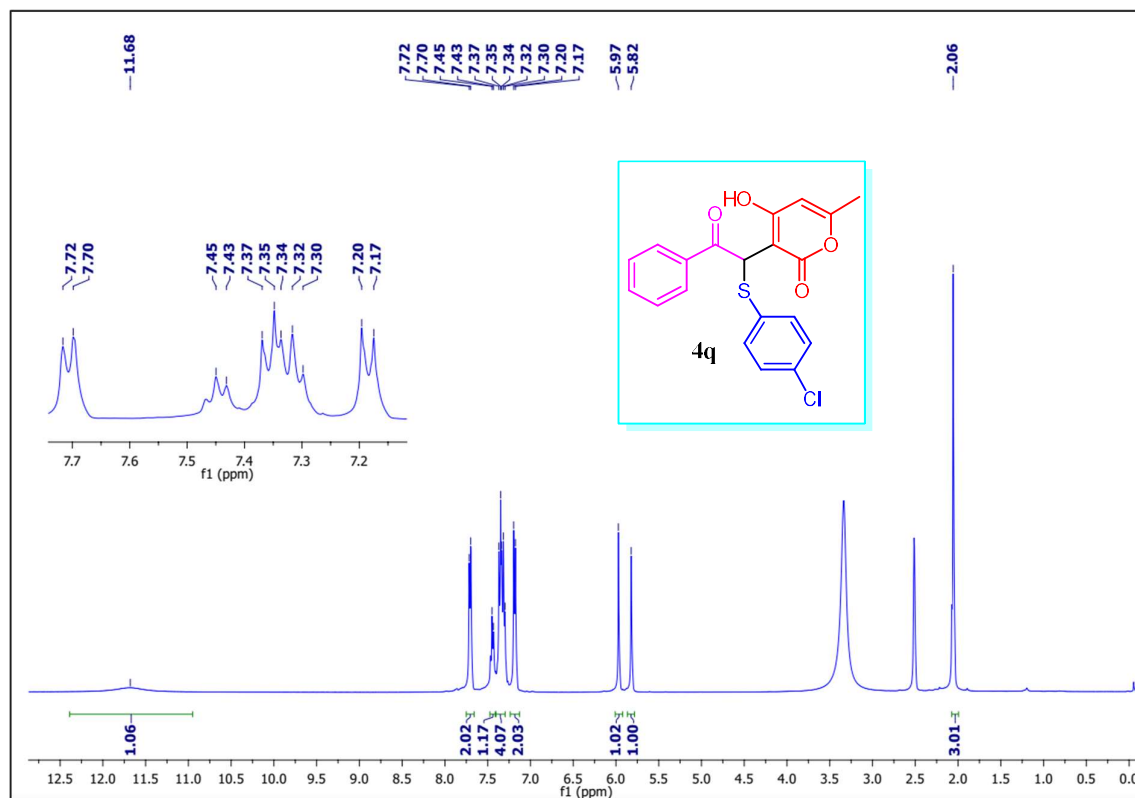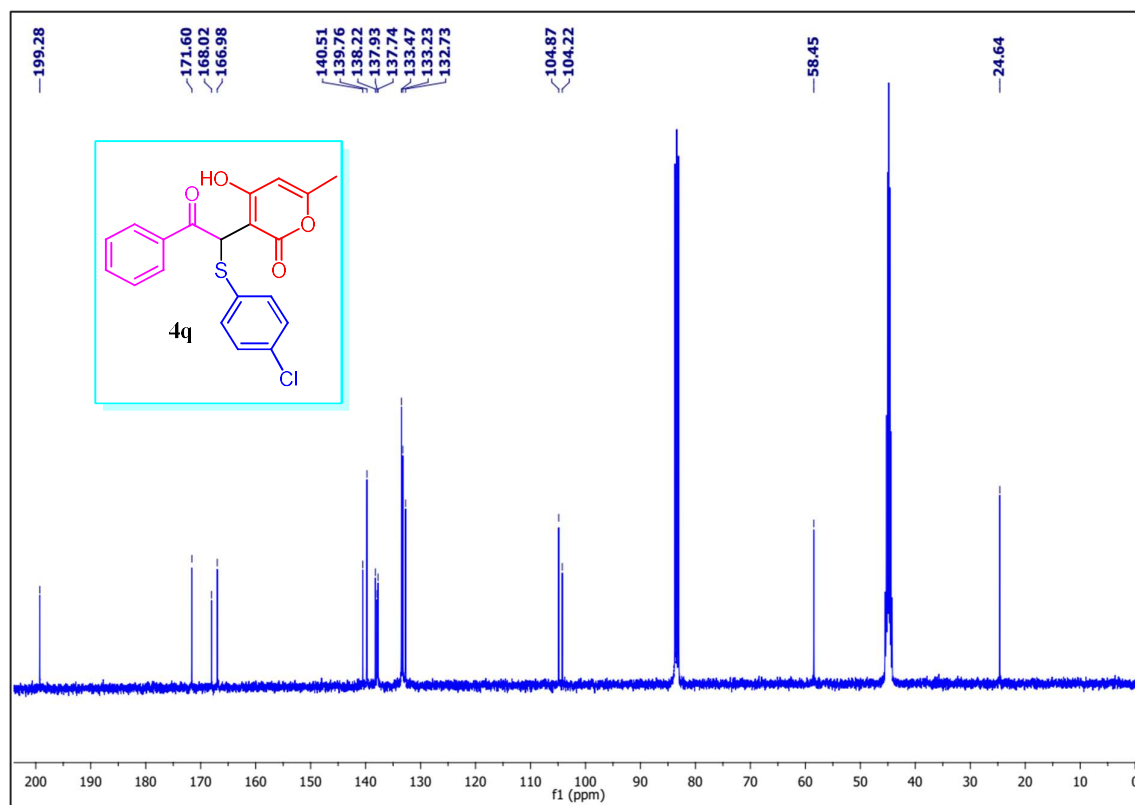

# $^1\text{H}$ & $^{13}\text{C}$ Spectra of 4r

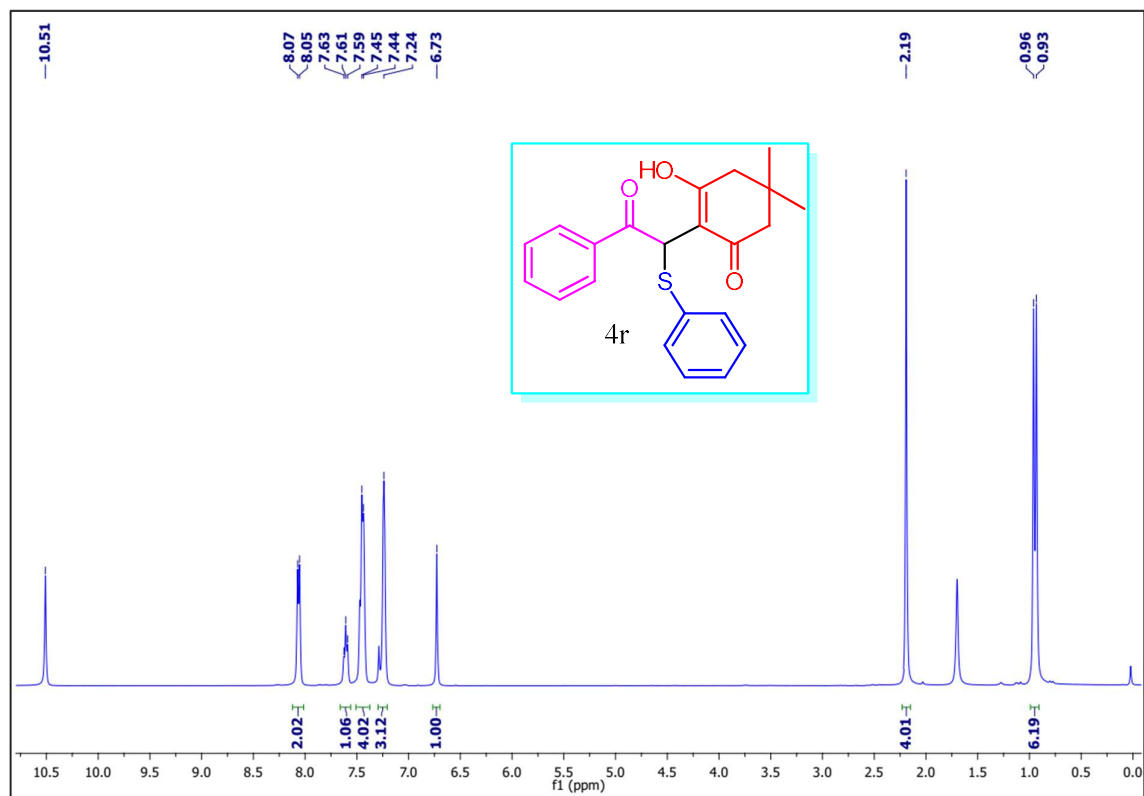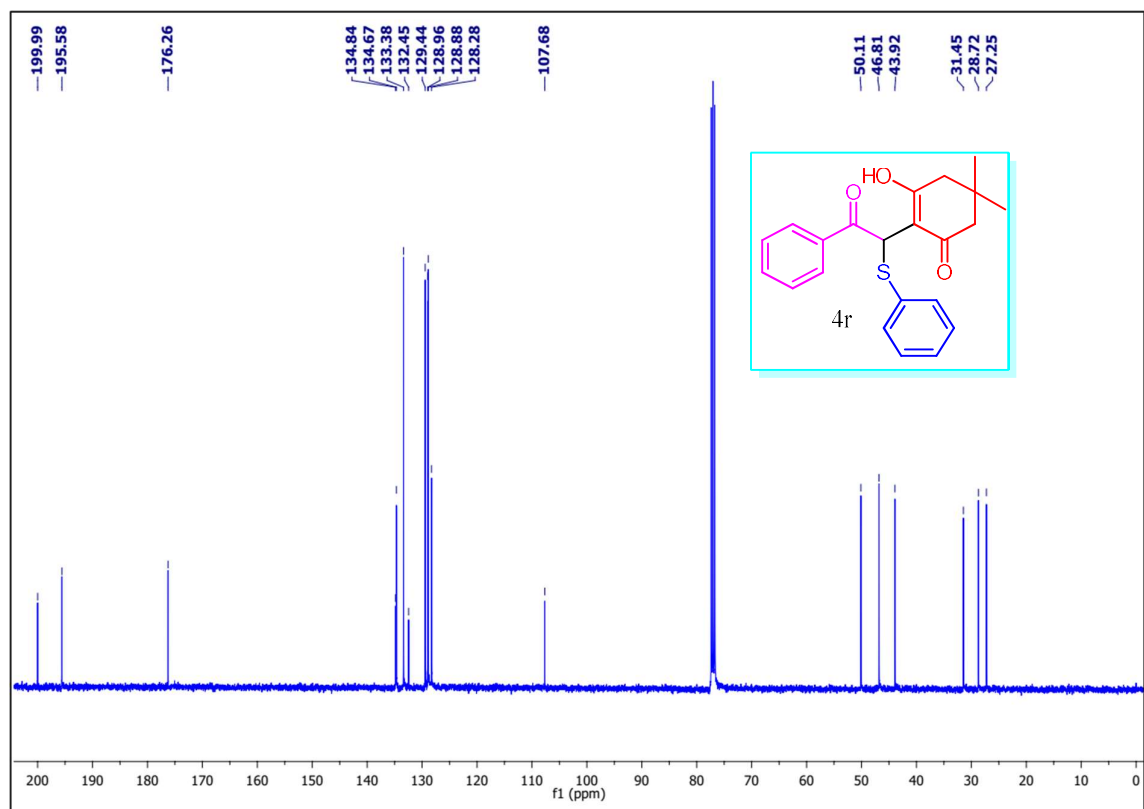

# $^1\text{H}$ & $^{13}\text{C}$ Spectra of 4s

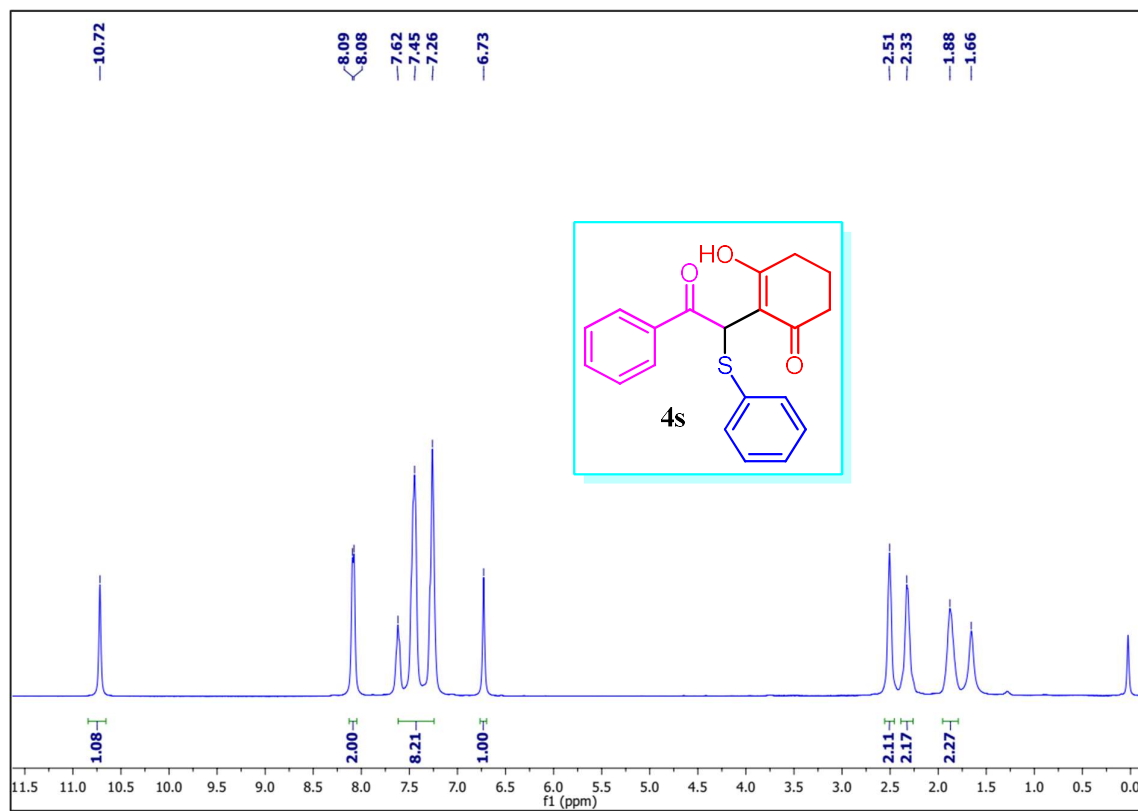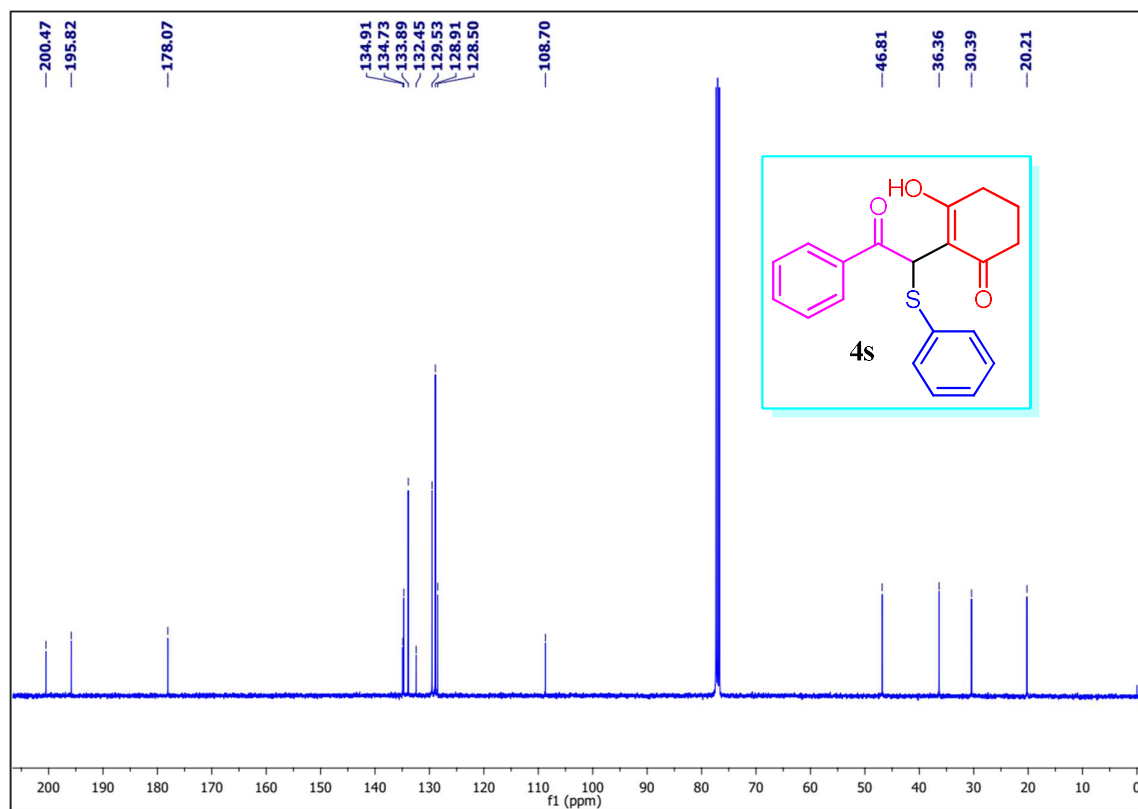

# $^1\text{H}$ & $^{13}\text{C}$ Spectra of 4t

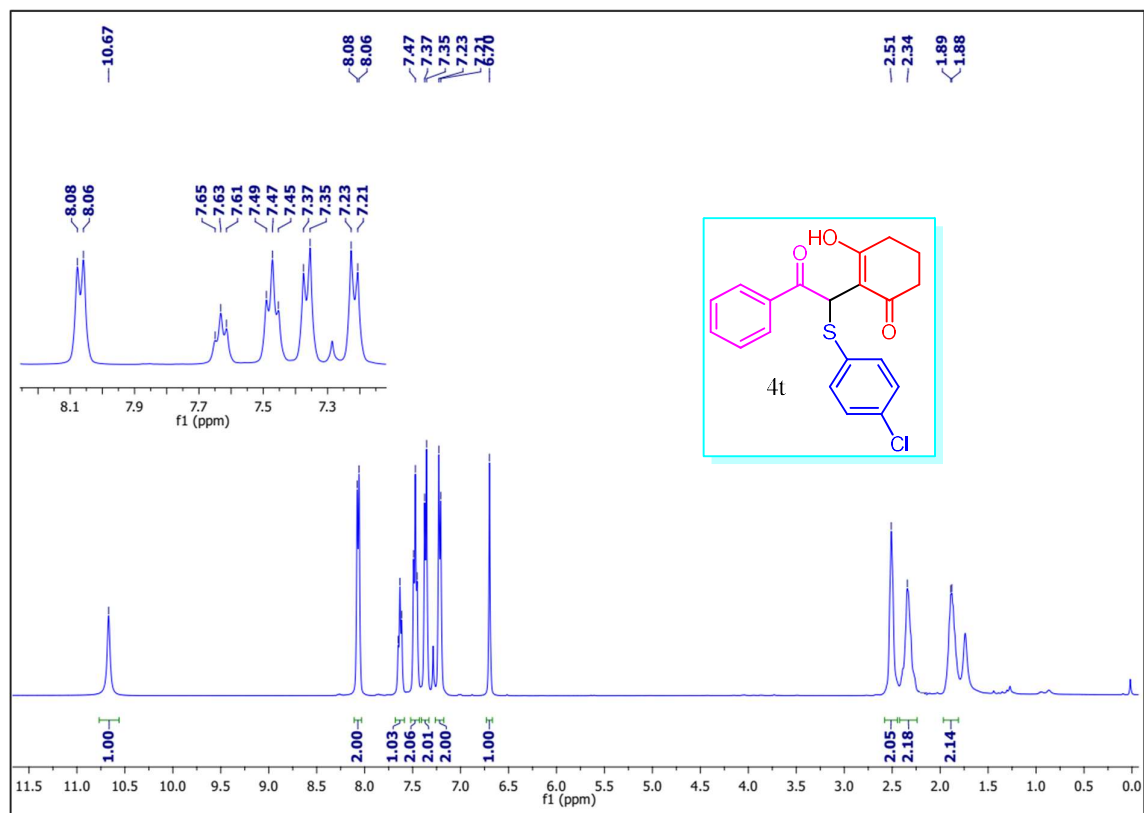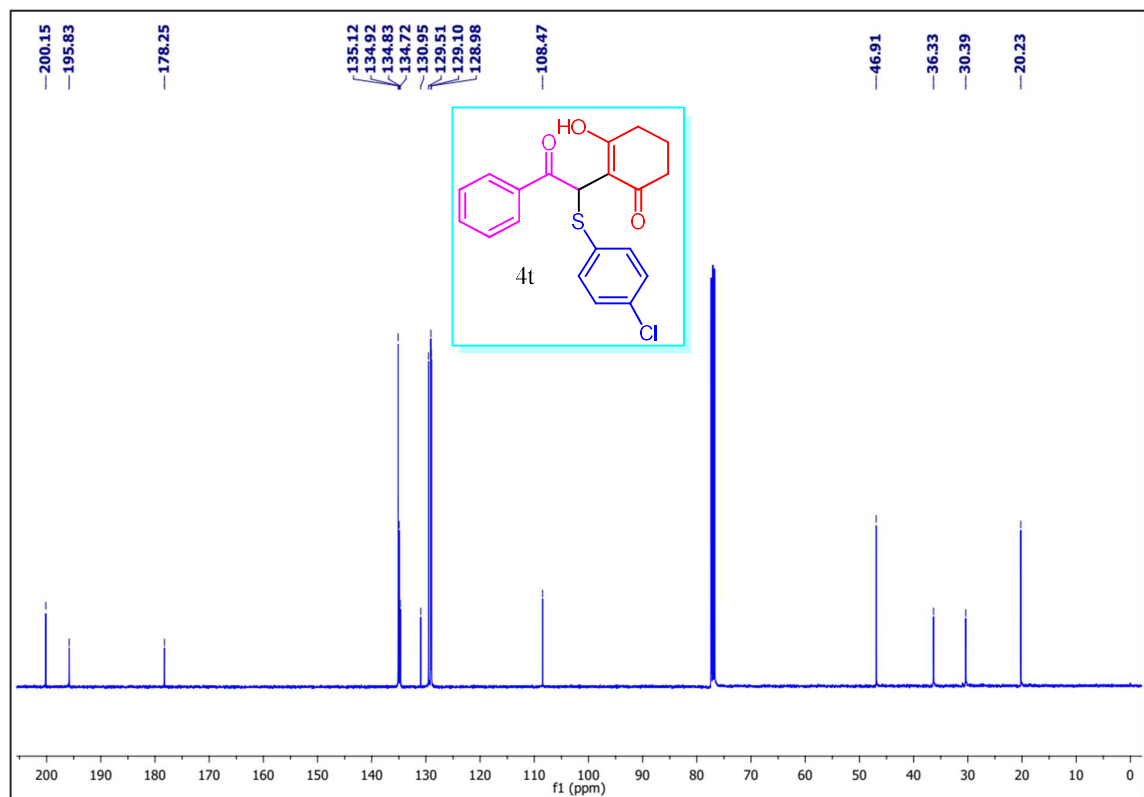

<sup>1</sup>H & <sup>13</sup>C Spectra of 5

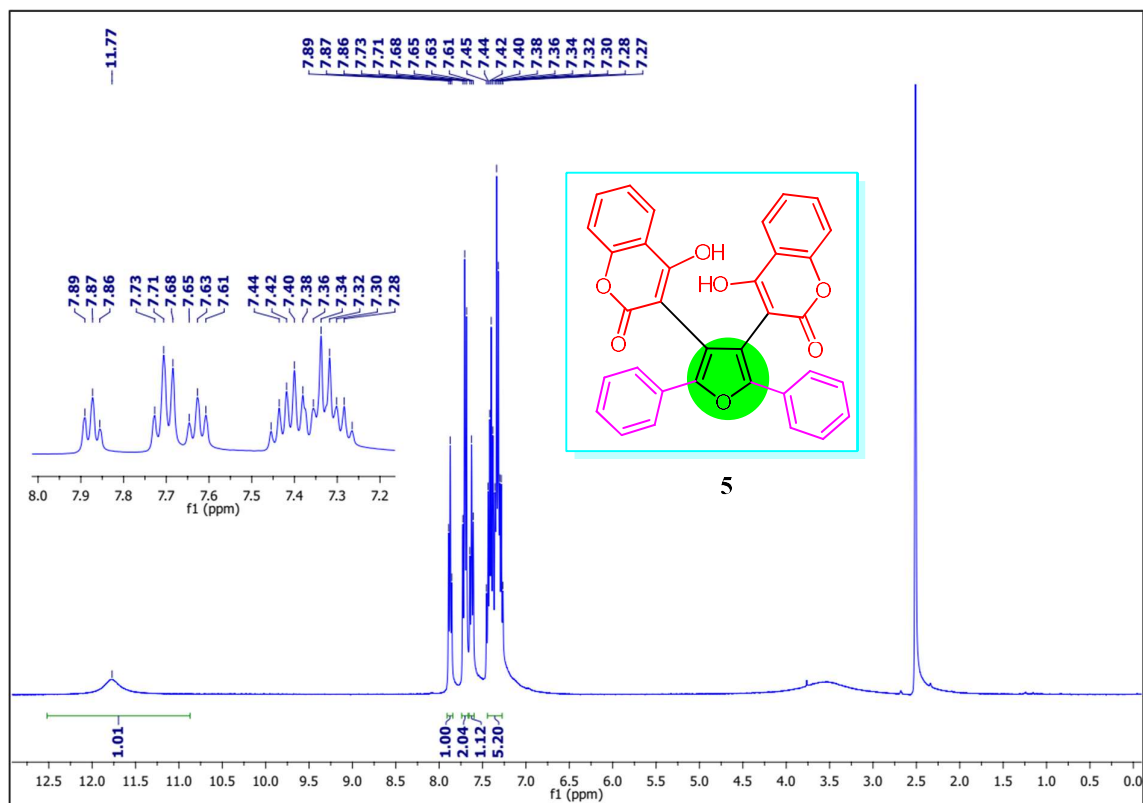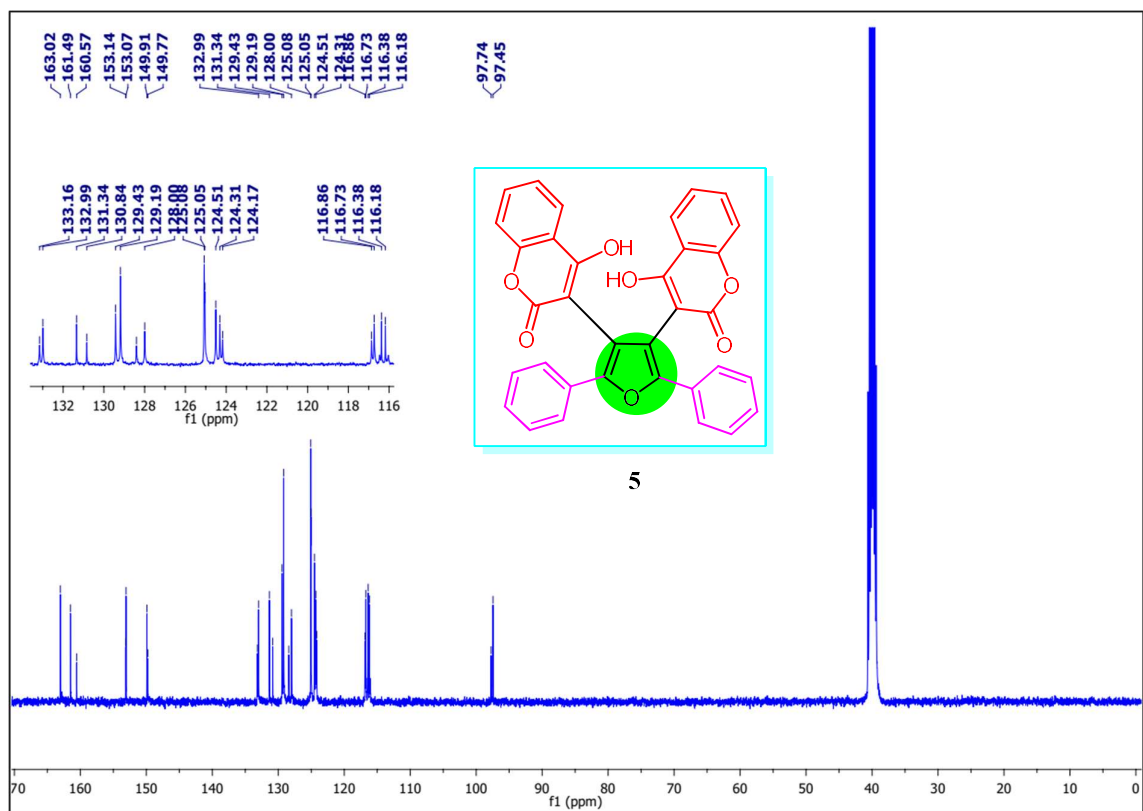

# <sup>1</sup>H & <sup>13</sup>C Spectra of 6a

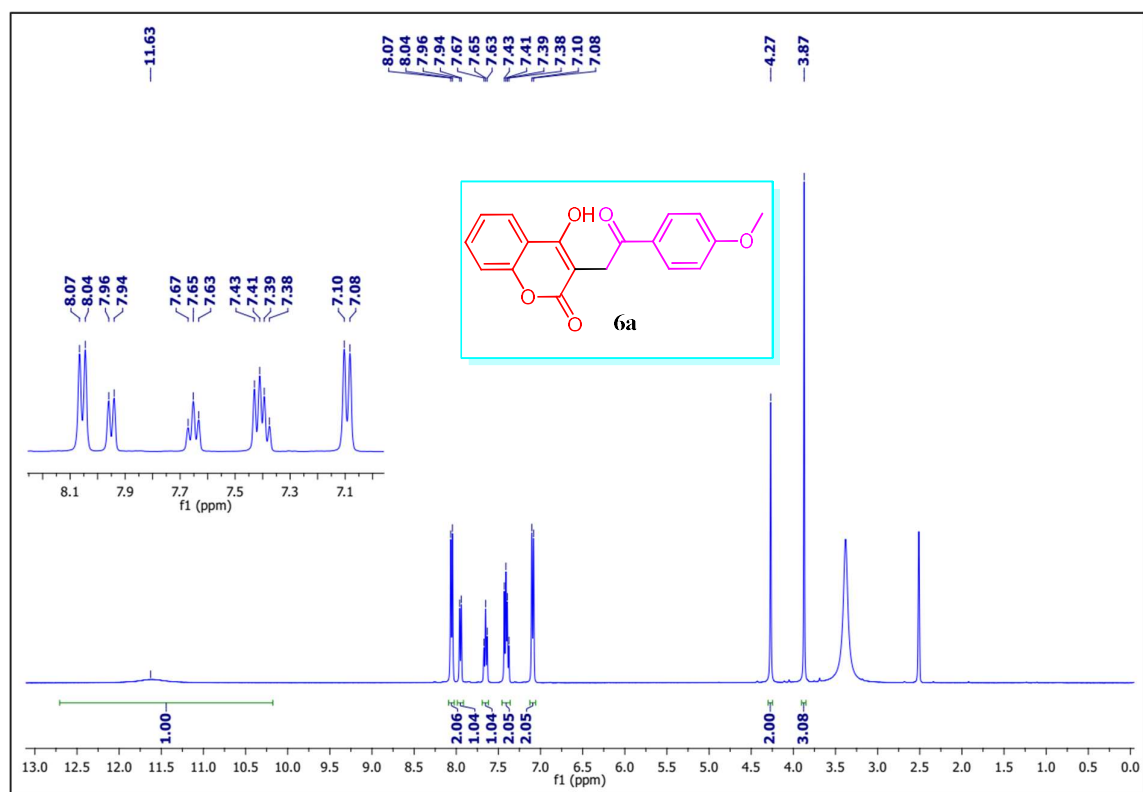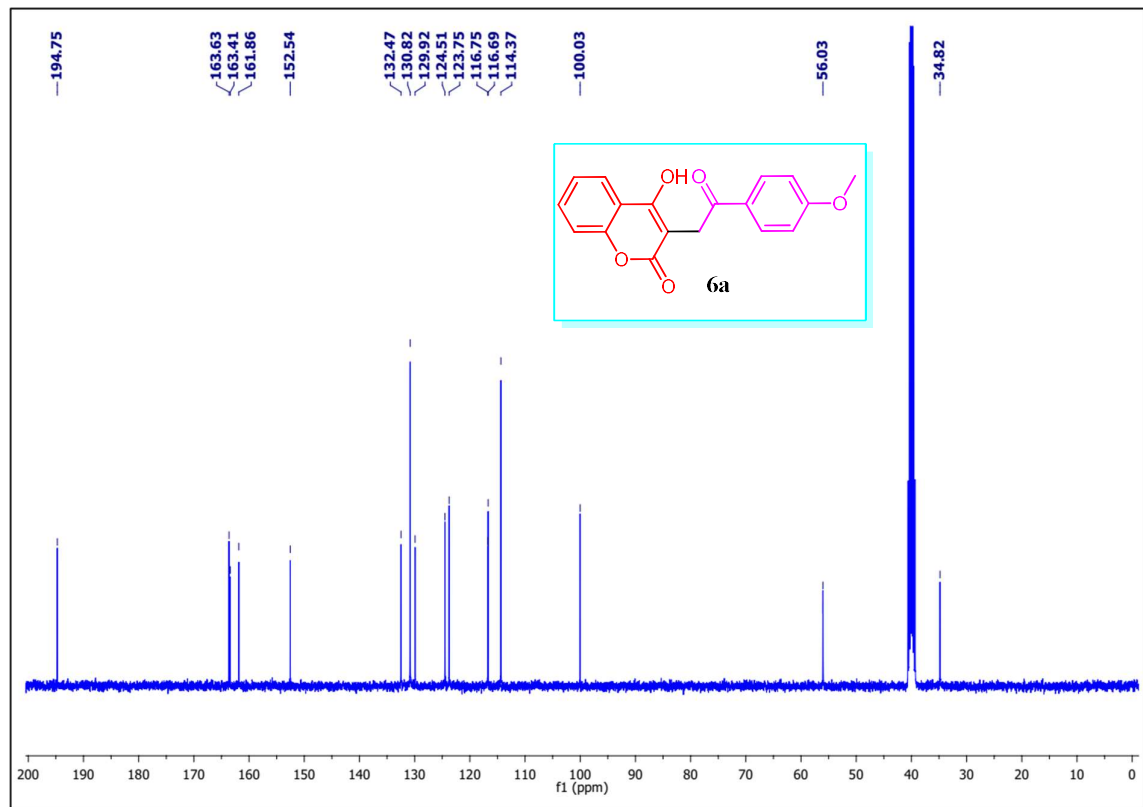

# <sup>1</sup>H & <sup>13</sup>C Spectra of 6b

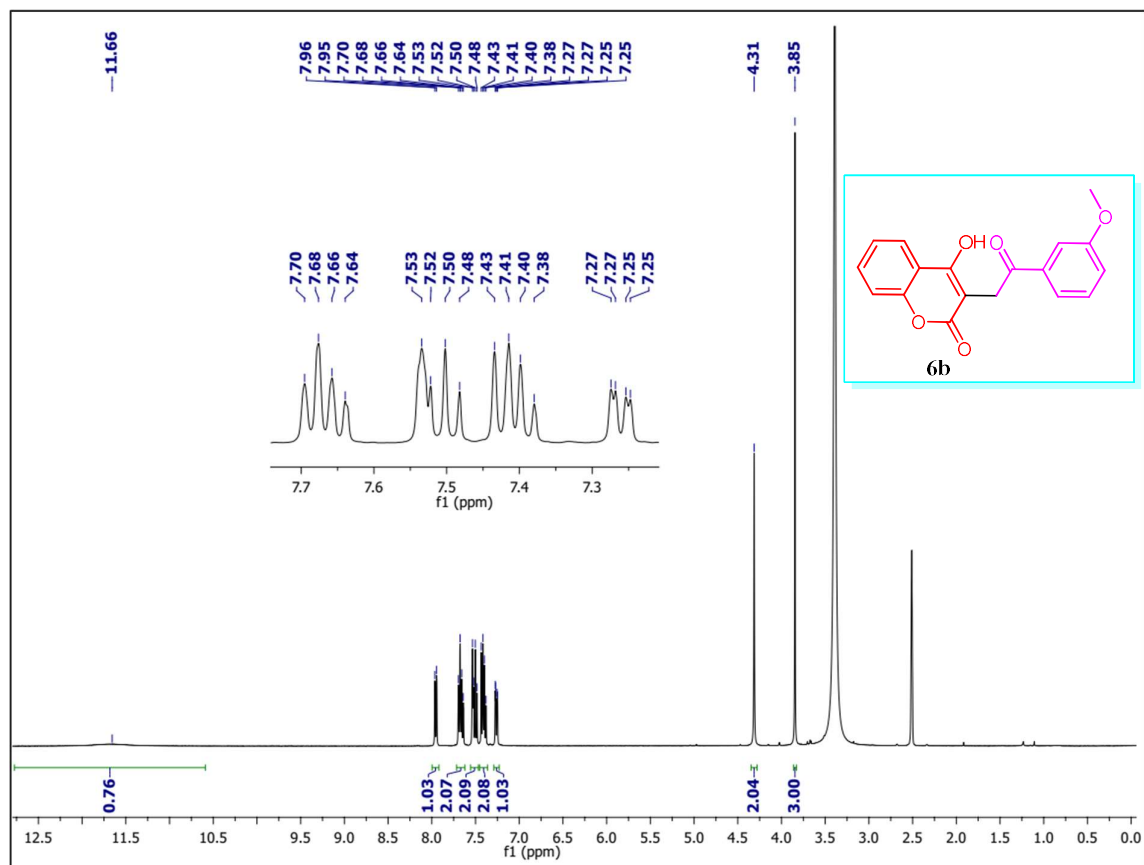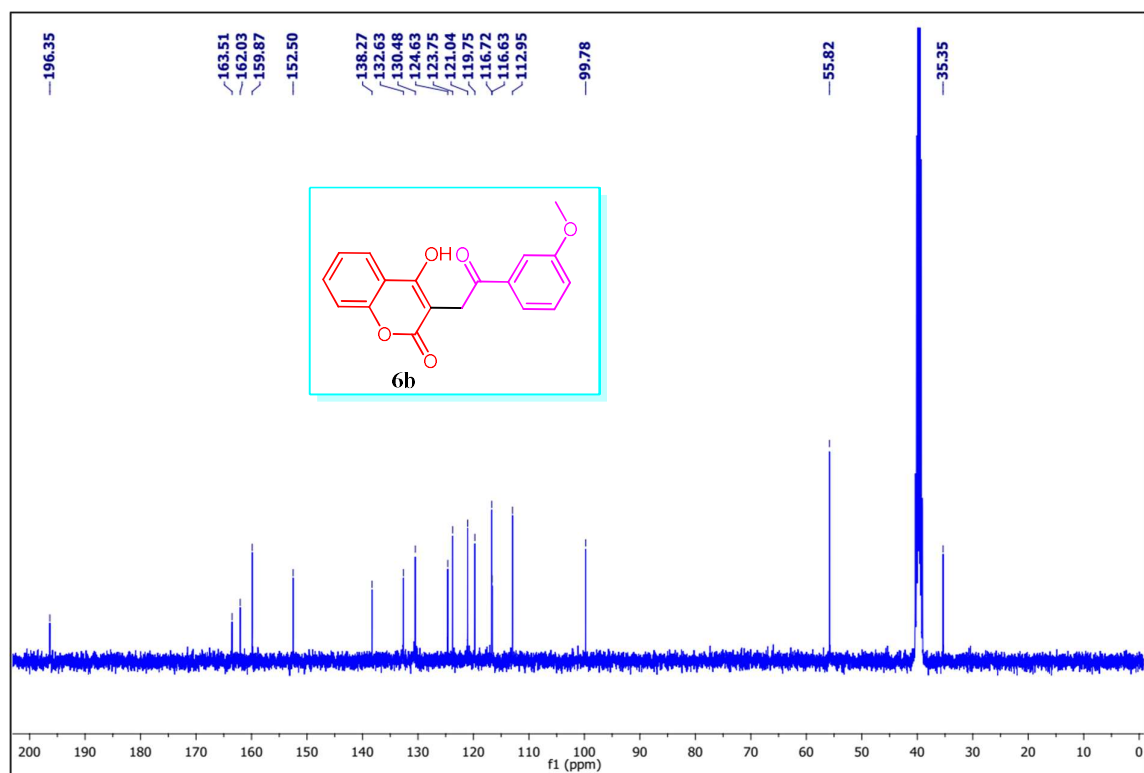



# <sup>1</sup>H & <sup>13</sup>C Spectra of 6c

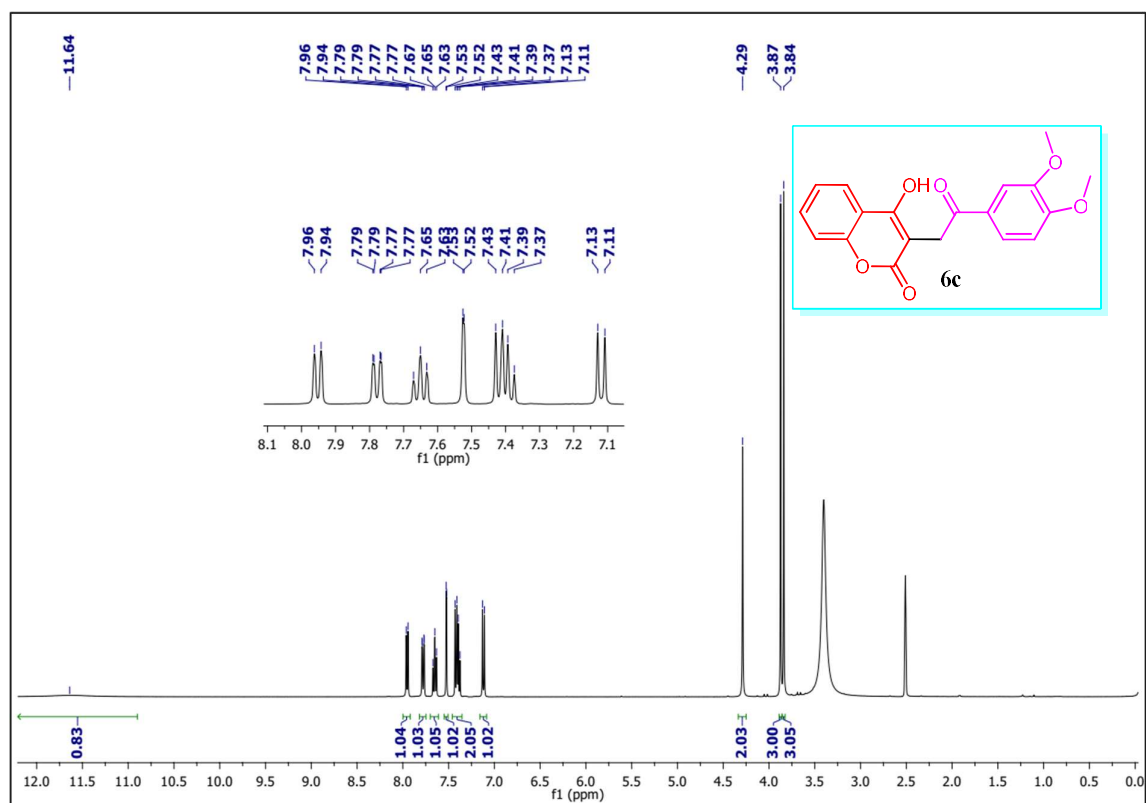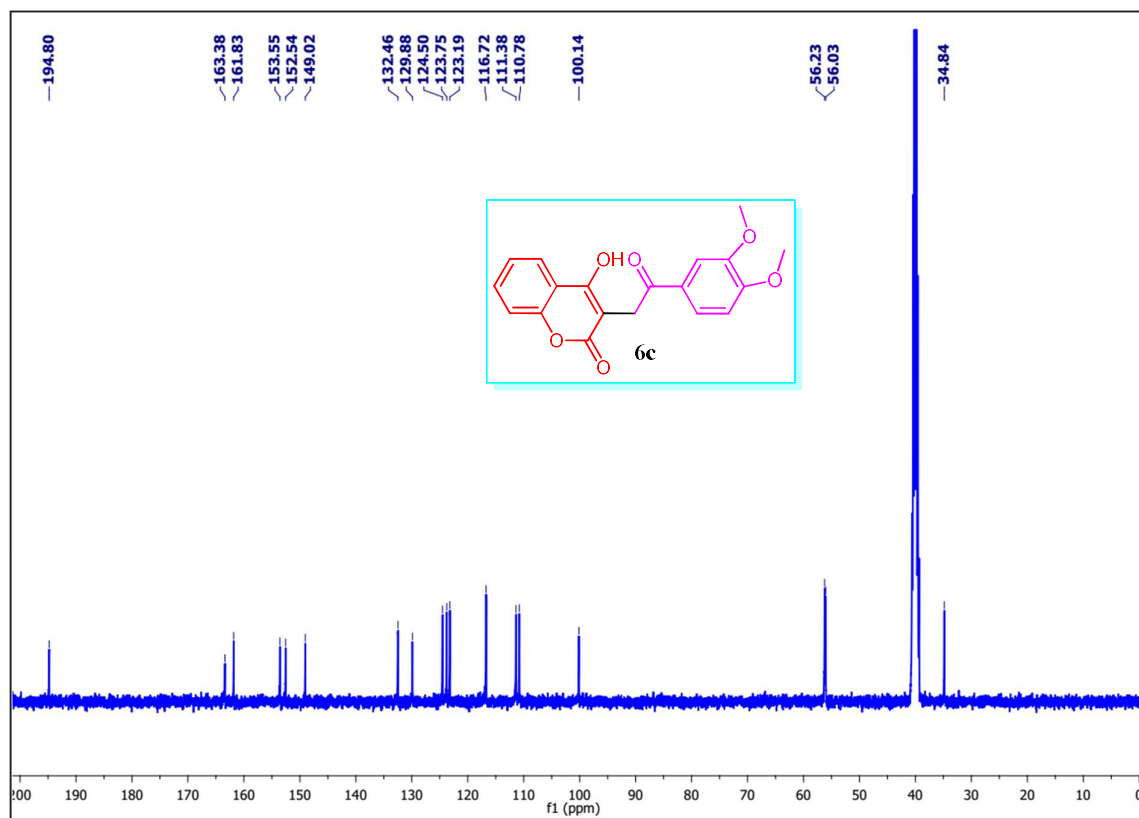

# $^1\text{H}$ & $^{13}\text{C}$ Spectra of 6d

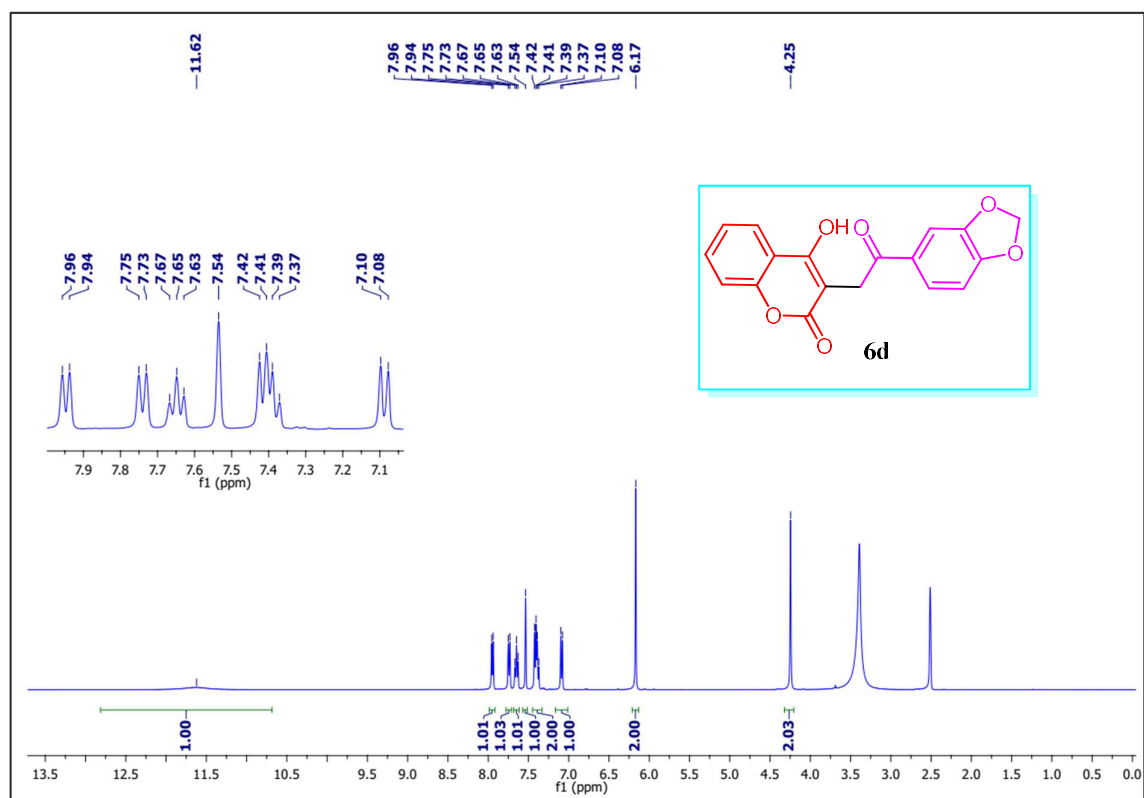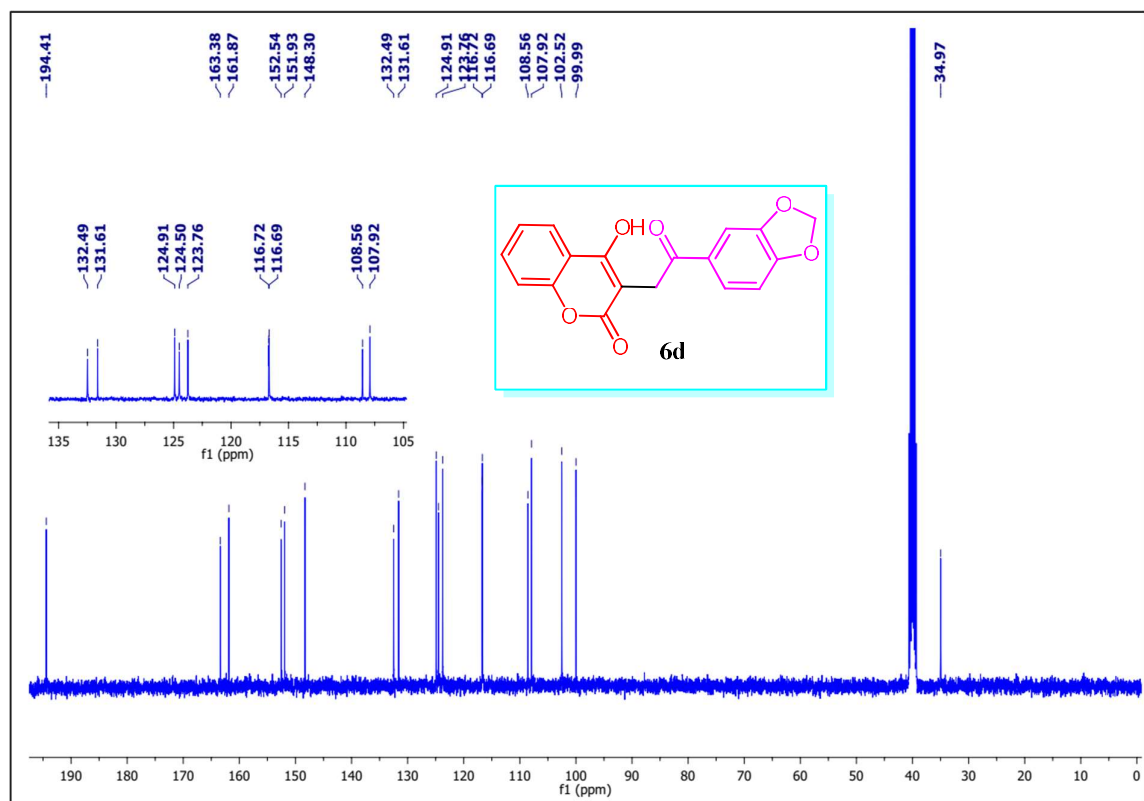

# $^1\text{H}$ & $^{13}\text{C}$ Spectra of 6e

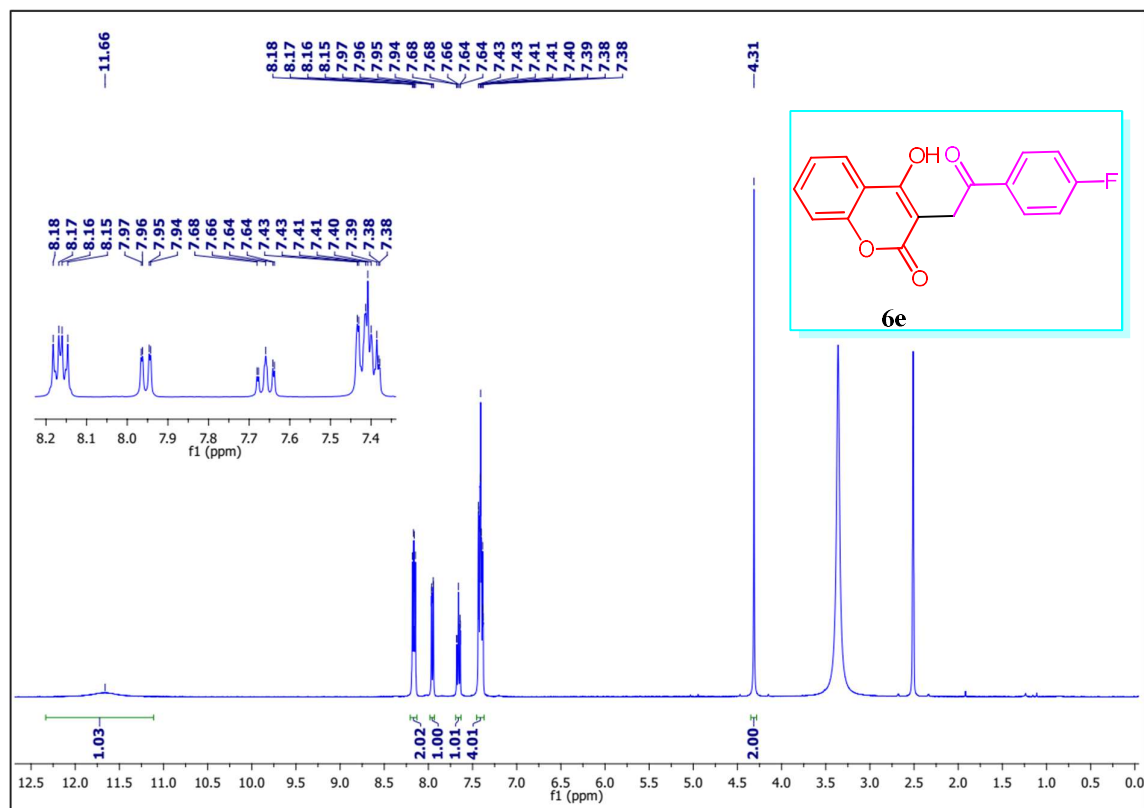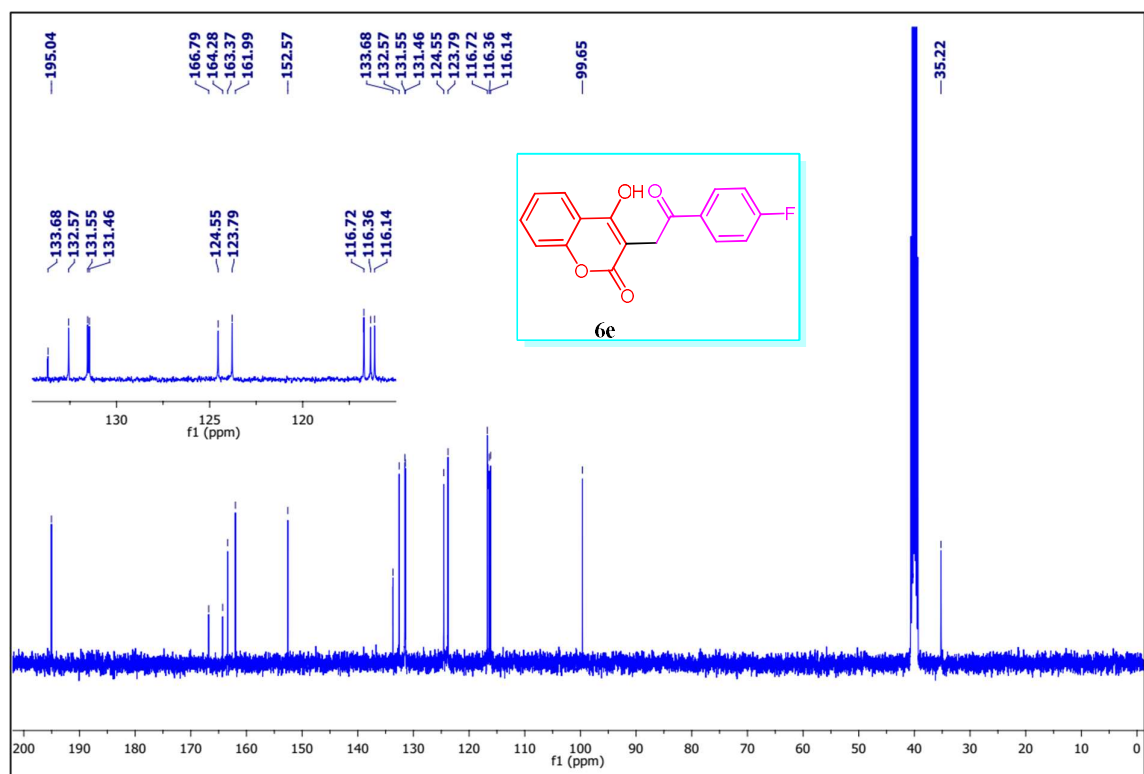

<sup>1</sup>H & <sup>13</sup>C Spectra of 7a

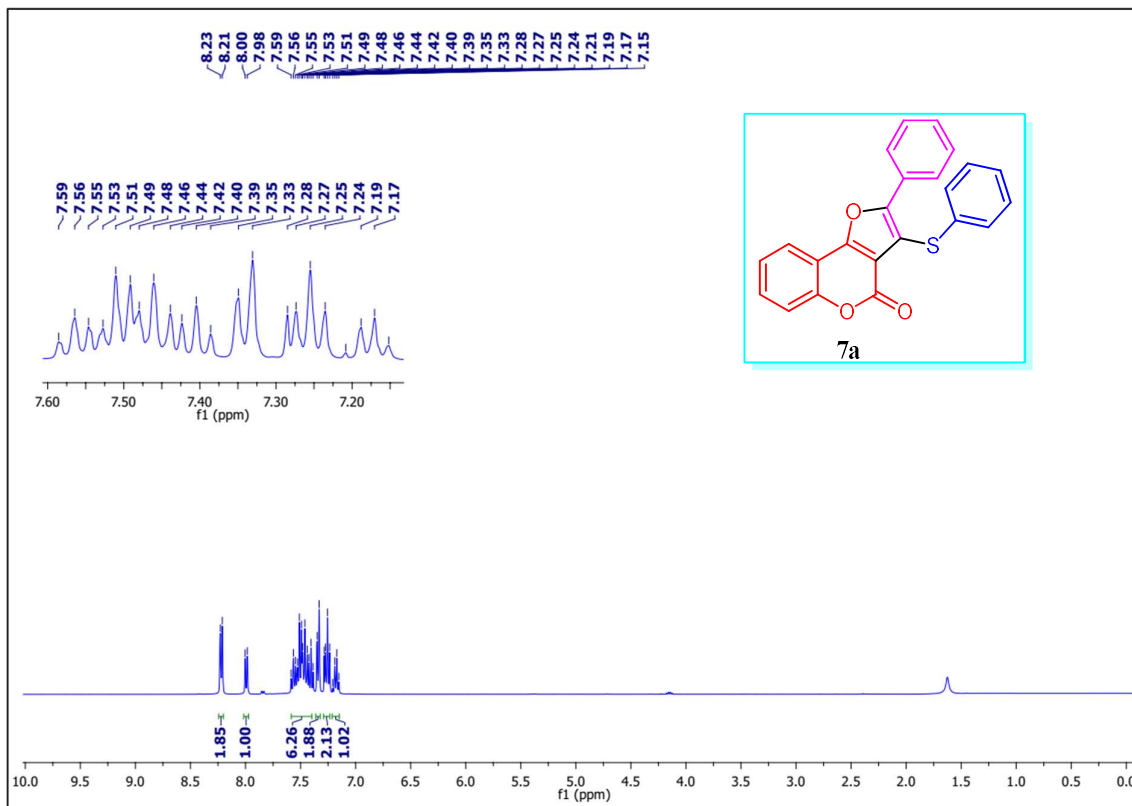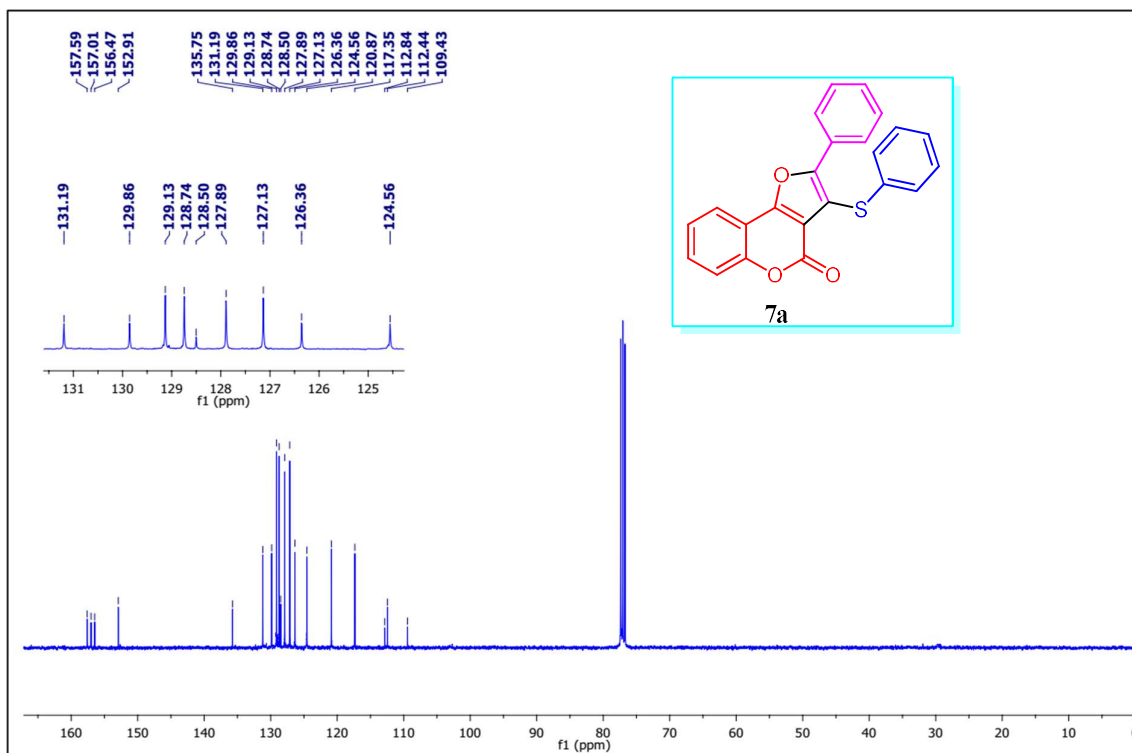

# <sup>1</sup>H & <sup>13</sup>C Spectra of 7c

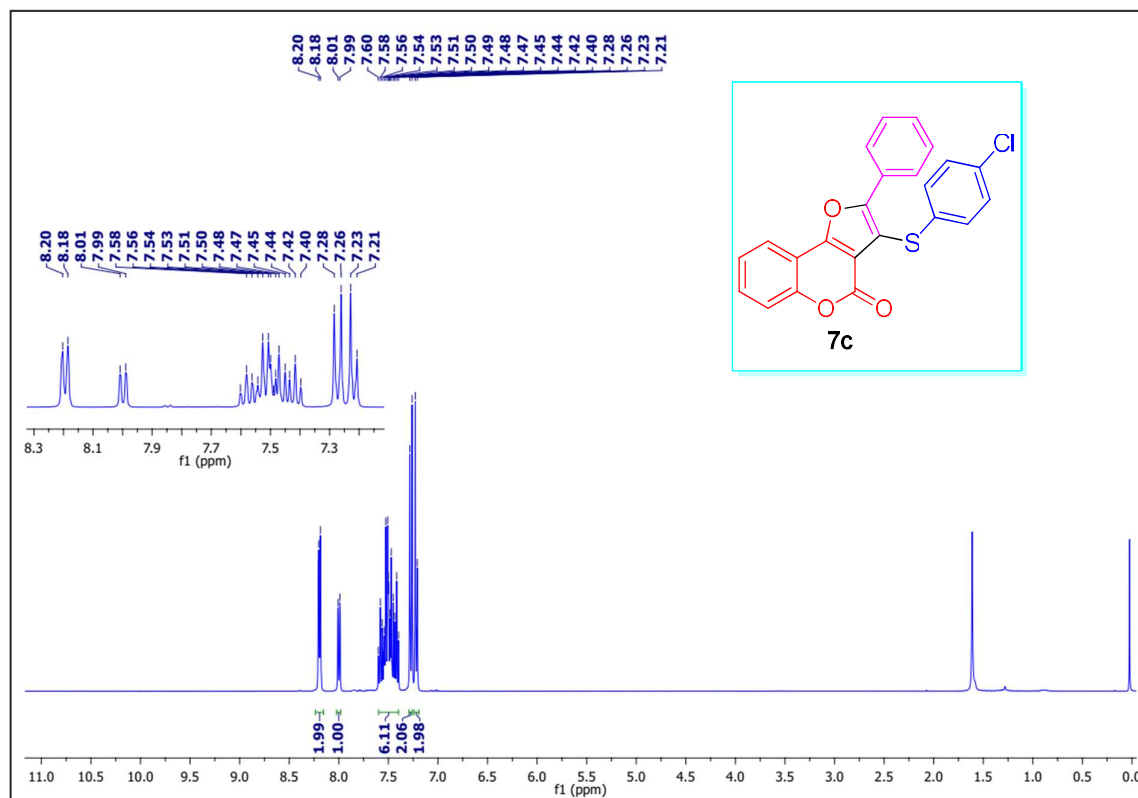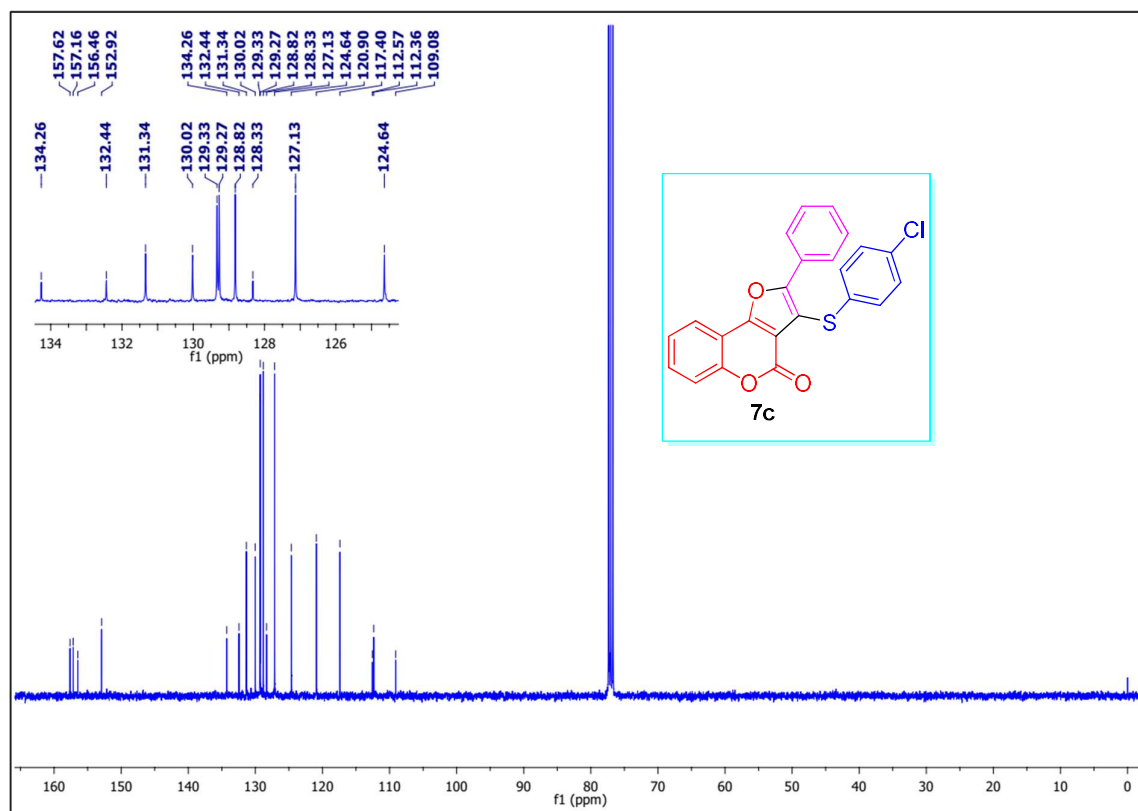

# <sup>1</sup>H & <sup>13</sup>C Spectra of 7j

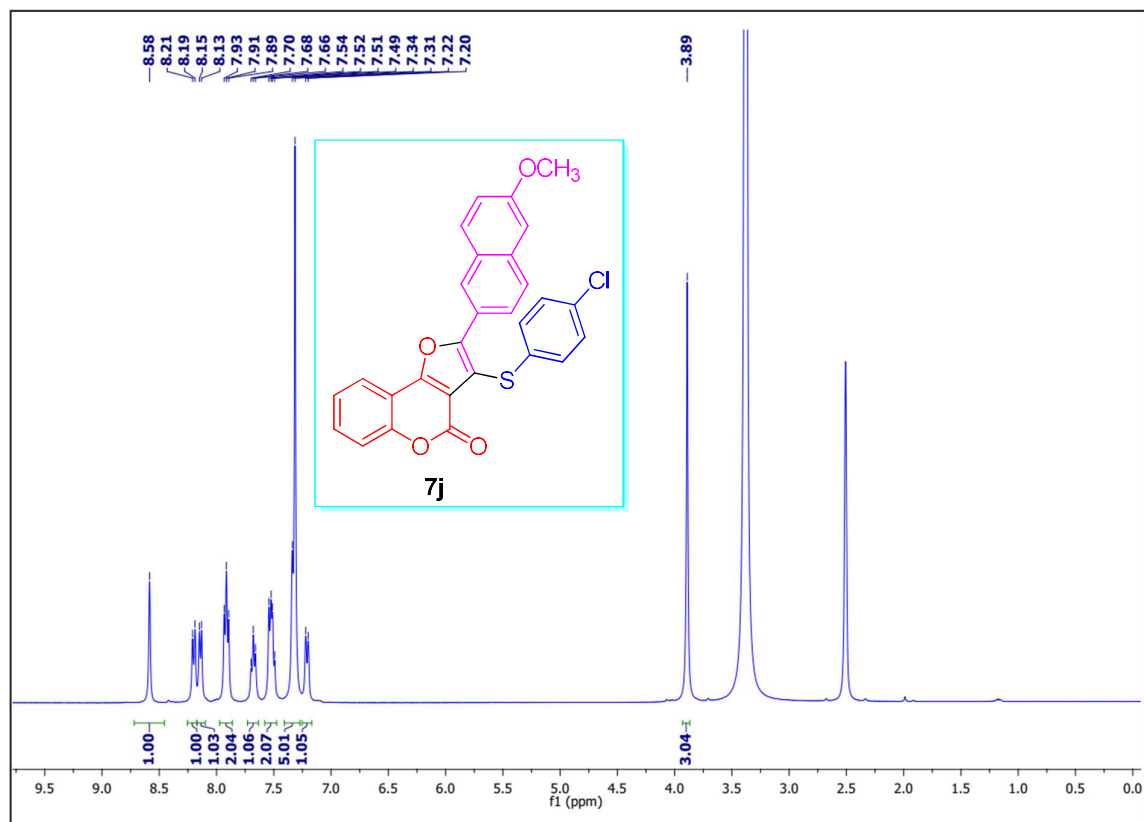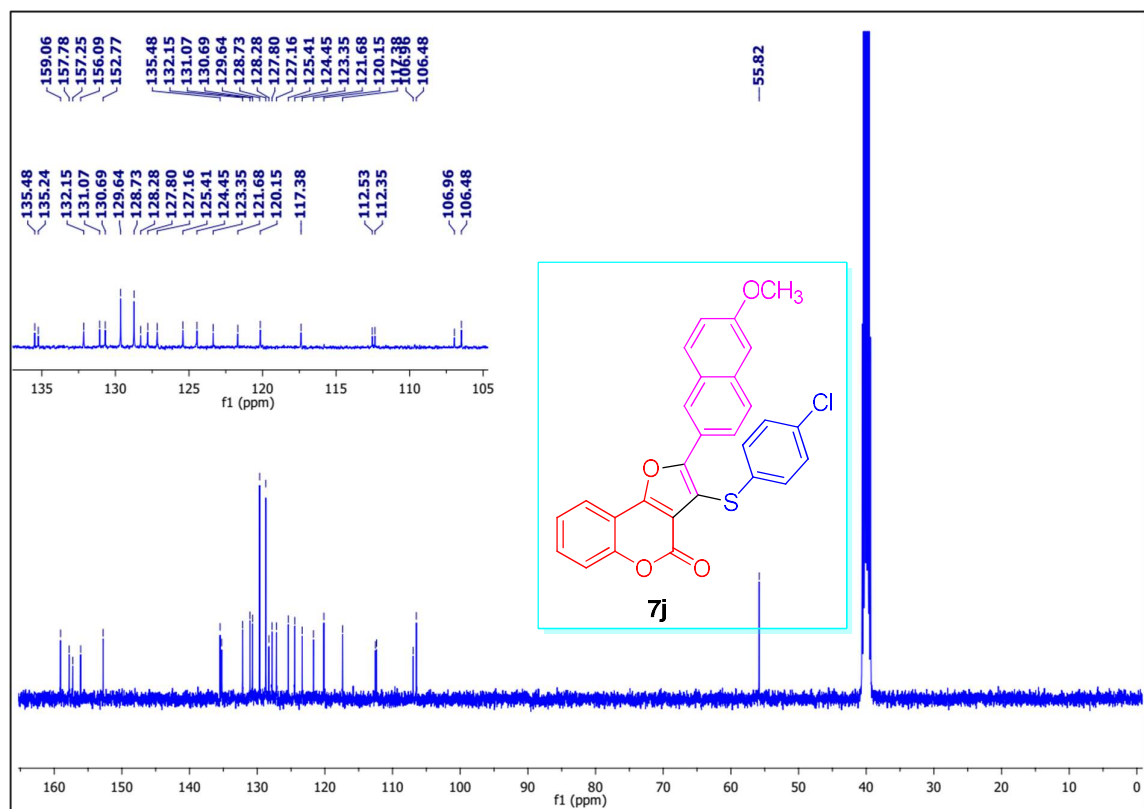

# $^1\text{H}$ & $^{13}\text{C}$ Spectra of 7r

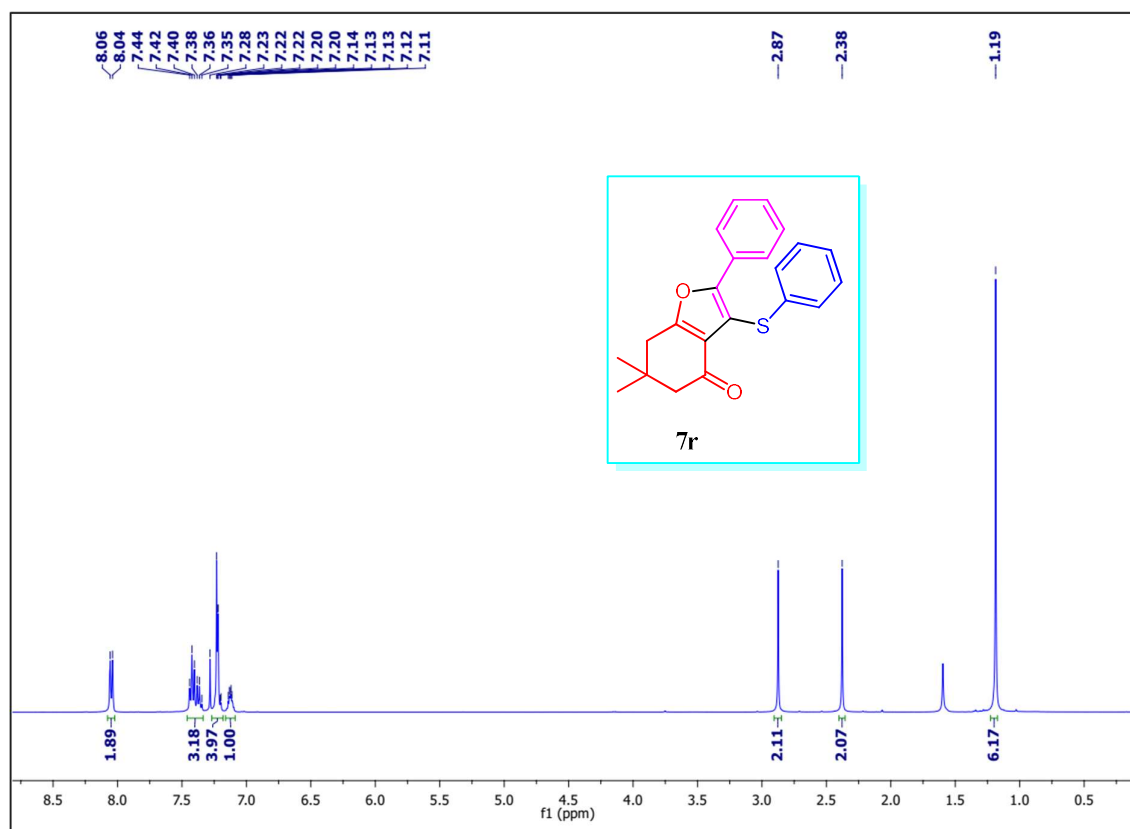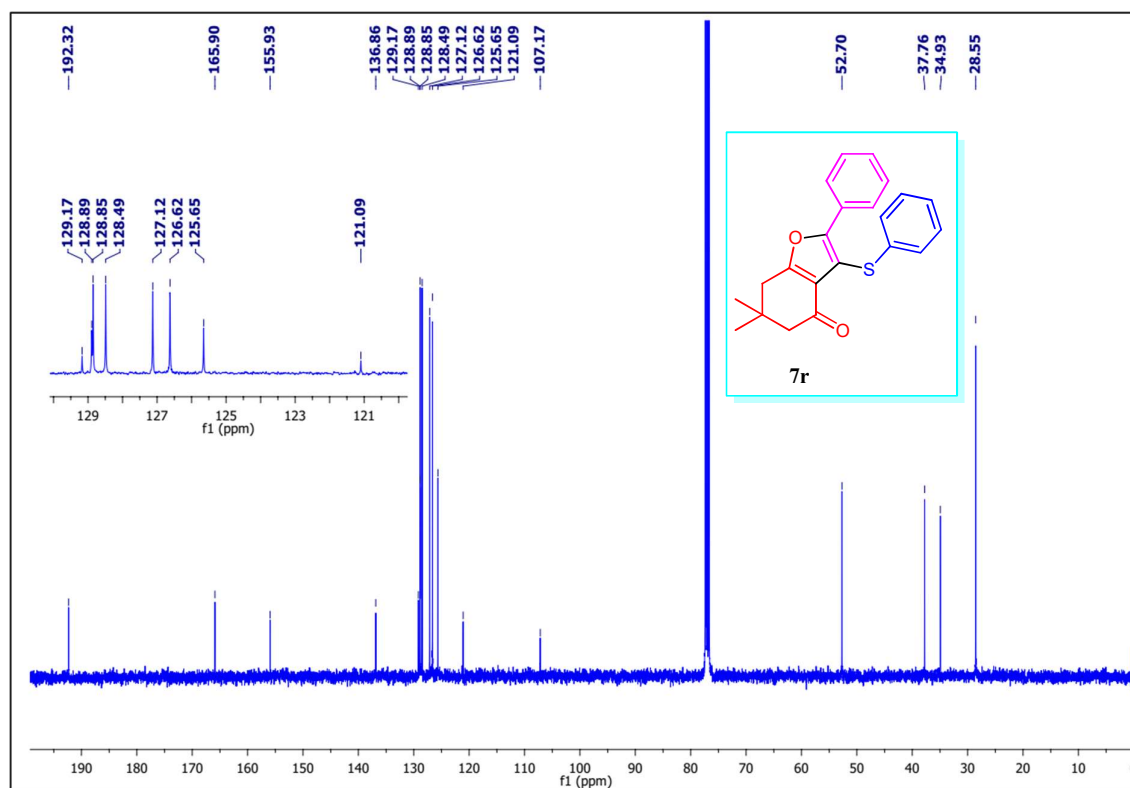

# $^1\text{H}$ & $^{13}\text{C}$ Spectra of 7u

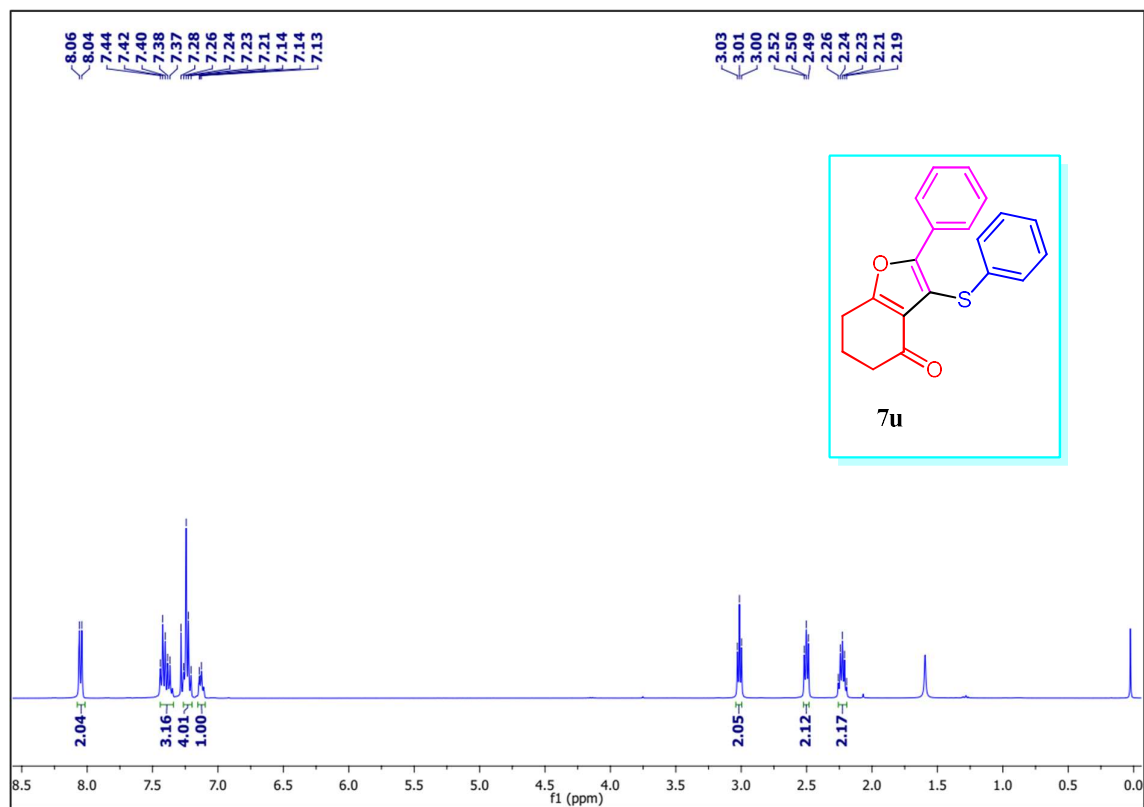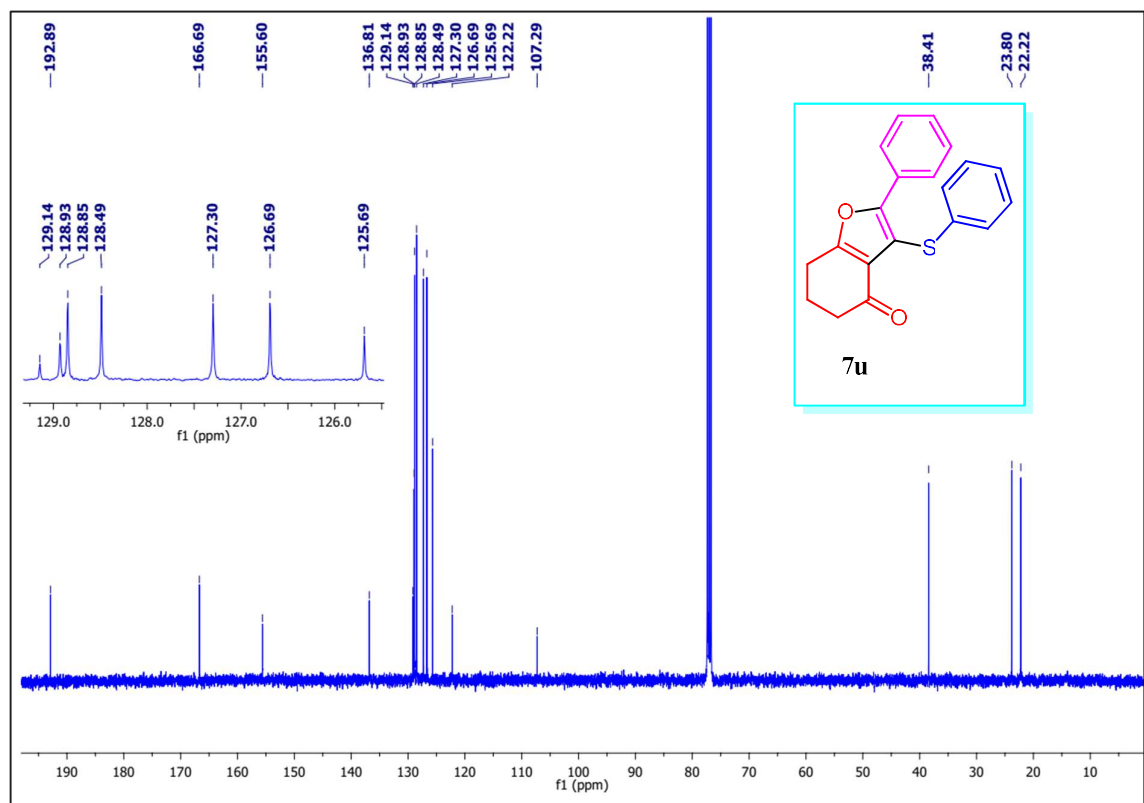



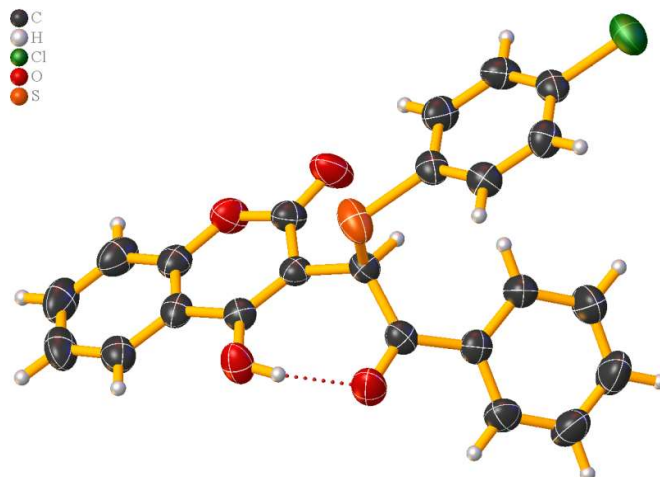

**Figure S1.** Ortep diagram of **4c** with 50% ellipsoidal probability (CCDC 1975421).

Table S1. Crystal data for compound **4c**

|                      |                                                    |                 |
|----------------------|----------------------------------------------------|-----------------|
| Identification code  | <b>4c</b>                                          |                 |
| Chemical formula     | C <sub>23</sub> H <sub>15</sub> ClO <sub>4</sub> S |                 |
| Formula weight       | 422.86 g/mol                                       |                 |
| Temperature          | 298(2) K                                           |                 |
| Wavelength           | 0.71073 Å                                          |                 |
| Crystal size         | 0.300 x 0.300 x 0.300 mm                           |                 |
| Crystal system       | triclinic                                          |                 |
| Space group          | P -1                                               |                 |
| Unit cell dimensions | a = 8.7831(8) Å                                    | α = 99.835(2)°  |
|                      | b = 8.9008(7) Å                                    | β = 100.128(2)° |
|                      | c = 13.3834(12) Å                                  | γ = 106.436(2)° |

|                                   |                                                                                                                                                                         |                           |
|-----------------------------------|-------------------------------------------------------------------------------------------------------------------------------------------------------------------------|---------------------------|
| Volume                            | 960.54(14) Å <sup>3</sup>                                                                                                                                               |                           |
| Z                                 | 2                                                                                                                                                                       |                           |
| Density (calculated)              | 1.462 g/cm <sup>3</sup>                                                                                                                                                 |                           |
| Absorption coefficient            | 0.336 mm <sup>-1</sup>                                                                                                                                                  |                           |
| F(000)                            | 436                                                                                                                                                                     |                           |
| Theta range for data collection   | 2.49 to 25.50°                                                                                                                                                          |                           |
| Index ranges                      | -10 ≤ h ≤ 10, -10 ≤ k ≤ 10, -16 ≤ l ≤ 16                                                                                                                                |                           |
| Reflections collected             | 26141                                                                                                                                                                   |                           |
| Independent reflections           | 3571 [R(int) = 0.0258]                                                                                                                                                  |                           |
| Max. and min. transmission        | 0.9040 and 0.9040                                                                                                                                                       |                           |
| Structure solution technique      | direct methods                                                                                                                                                          |                           |
| Structure solution program        | SHELXS-97 (Sheldrick 2008)                                                                                                                                              |                           |
| Refinement method                 | Full-matrix least-squares on F <sup>2</sup>                                                                                                                             |                           |
| Refinement program                | SHELXL-2014 (Sheldrick 2014)                                                                                                                                            |                           |
| Function minimized                | Σ w(F <sub>o</sub> <sup>2</sup> - F <sub>c</sub> <sup>2</sup> ) <sup>2</sup>                                                                                            |                           |
| Data / restraints / parameters    | 3571 / 0 / 264                                                                                                                                                          |                           |
| Goodness-of-fit on F <sup>2</sup> | 1.039                                                                                                                                                                   |                           |
| Final R indices                   | 2945 data; I > 2σ(I)                                                                                                                                                    | R1 = 0.0391, wR2 = 0.0938 |
|                                   | all data                                                                                                                                                                | R1 = 0.0505, wR2 = 0.1010 |
| Weighting scheme                  | w = 1 / [σ <sup>2</sup> (F <sub>o</sub> <sup>2</sup> ) + (0.0400P) <sup>2</sup> + 0.5229P], where P = (F <sub>o</sub> <sup>2</sup> + 2F <sub>c</sub> <sup>2</sup> ) / 3 |                           |
| Extinction coefficient            | 0.0094(15)                                                                                                                                                              |                           |
| Largest diff. peak and hole       | 0.403 and -0.267 eÅ <sup>-3</sup>                                                                                                                                       |                           |
| R.M.S. deviation from mean        | 0.039 eÅ <sup>-3</sup>                                                                                                                                                  |                           |

---

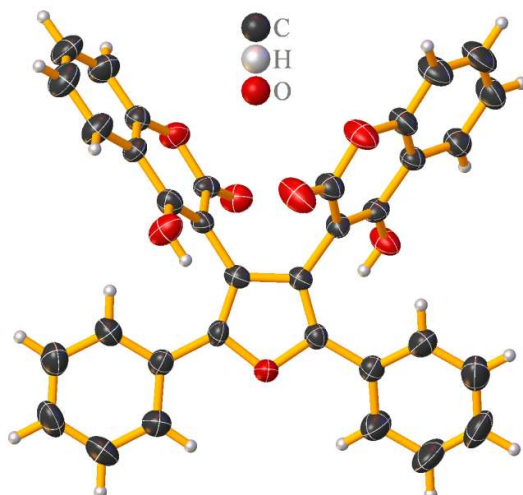

**Figure S2.** Ortep diagram of **5** with 50% ellipsoidal probability; one molecule of **5** and two disordered DMSO molecules have been removed for clarity (CCDC 1975422).

Table S2. Crystal data for compound **5**.

|                      |                            |                            |
|----------------------|----------------------------|----------------------------|
| Identification code  | <b>5</b>                   |                            |
| Chemical formula     | $C_{72}H_{52}O_{16}S_2$    |                            |
| Formula weight       | 1237.26 g/mol              |                            |
| Temperature          | 298(2) K                   |                            |
| Wavelength           | 0.71073 Å                  |                            |
| Crystal size         | 0.050 x 0.100 x 0.300 mm   |                            |
| Crystal system       | triclinic                  |                            |
| Space group          | P -1                       |                            |
| Unit cell dimensions | $a = 13.7724(13)$ Å        | $\alpha = 80.591(2)^\circ$ |
|                      | $b = 15.3172(15)$ Å        | $\beta = 65.912(2)^\circ$  |
|                      | $c = 15.8809(15)$ Å        | $\gamma = 82.455(2)^\circ$ |
| Volume               | $3009.5(5)$ Å <sup>3</sup> |                            |
| Z                    | 2                          |                            |

|                                   |                                                                                                                                                             |                           |
|-----------------------------------|-------------------------------------------------------------------------------------------------------------------------------------------------------------|---------------------------|
| Density (calculated)              | 1.365 g/cm <sup>3</sup>                                                                                                                                     |                           |
| Absorption coefficient            | 0.162 mm <sup>-1</sup>                                                                                                                                      |                           |
| F(000)                            | 1288                                                                                                                                                        |                           |
| Theta range for data collection   | 2.54 to 18.87°                                                                                                                                              |                           |
| Index ranges                      | -12≤h≤12, -13≤k≤13, -14≤l≤14                                                                                                                                |                           |
| Reflections collected             | 25696                                                                                                                                                       |                           |
| Independent reflections           | 4753 [R(int) = 0.0534]                                                                                                                                      |                           |
| Max. and min. transmission        | 0.9920 and 0.9810                                                                                                                                           |                           |
| Structure solution technique      | direct methods                                                                                                                                              |                           |
| Structure solution program        | SHELXS-97 (Sheldrick 2008)                                                                                                                                  |                           |
| Refinement method                 | Full-matrix least-squares on F <sup>2</sup>                                                                                                                 |                           |
| Refinement program                | SHELXL-2014 (Sheldrick 2014)                                                                                                                                |                           |
| Function minimized                | Σ w(F <sub>o</sub> <sup>2</sup> - F <sub>c</sub> <sup>2</sup> ) <sup>2</sup>                                                                                |                           |
| Data / restraints / parameters    | 4753 / 106 / 865                                                                                                                                            |                           |
| Goodness-of-fit on F <sup>2</sup> | 1.023                                                                                                                                                       |                           |
| Final R indices                   | 3647 data; I>2σ(I)                                                                                                                                          | R1 = 0.0397, wR2 = 0.0907 |
|                                   | all data                                                                                                                                                    | R1 = 0.0599, wR2 = 0.1022 |
| Weighting scheme                  | w=1/[σ <sup>2</sup> (F <sub>o</sub> <sup>2</sup> )+(0.0454P) <sup>2</sup> +2.3442P], where P=(F <sub>o</sub> <sup>2</sup> +2F <sub>c</sub> <sup>2</sup> )/3 |                           |
| Extinction coefficient            | 0.0035(4)                                                                                                                                                   |                           |
| Largest diff. peak and hole       | 0.233 and -0.168 eÅ <sup>-3</sup>                                                                                                                           |                           |
| R.M.S. deviation from mean        | 0.033 eÅ <sup>-3</sup>                                                                                                                                      |                           |

---
